# Supplementary material
Source: publisher figshare collection journal article supplement (https://rs.figshare.com/ndownloader/files/24111284)
Supplement: Supplementary file 1 [file 24111284]

## Sheet: original data for analysis
force time series for brittle alumina foam (BAF) and ductile metallic glass foam(DMGF)						burst displacementtime (BD) or Avalanche size time series for brittle alumina foam (BAF) and ductile metallic glass foam(DMGF)
BAF			DMGF			BAF			DMGF
time(s)	force(N)		time(s)	force(N)		time(s)	BD(mm)		time(s)	BD(mm)
0.01	-28.2138		0.01	5.66728		0.08	5.45217e-06		0.07	1.18024e-06
0.02	-30.752		0.02	7.91609		0.1	3.37184e-07		0.14	9.0616e-07
0.03	-6.98794		0.03	6.26664		0.12	2.22314e-06		0.23	9.0269e-07
0.04	-4.71152		0.04	11.236		0.16	6.09205e-07		0.29	1.3215e-06
0.05	-18.578		0.05	12.4707		0.2	1.91739e-06		0.36	3.38059e-06
0.06	-19.3005		0.06	15.3021		0.24	2.74766e-06		0.44	7.63269e-05
0.07	-1.99601		0.07	15.6302		0.29	1.69504e-06		0.5	7.49169e-05
0.08	-1.23739		0.08	10.0878		0.32	2.87153e-06		0.61	4.91683e-06
0.09	-19.2737		0.09	8.4618		0.37	1.19173e-06		0.65	6.15856e-07
0.1	-11.511		0.1	16.8265		0.4	1.72108e-06		0.69	1.34188e-06
0.11	-18.576		0.11	21.0837		0.46	1.35991e-06		0.71	2.0405e-06
0.12	-2.22892		0.12	15.512		0.49	1.5179e-08		0.77	1.61124e-06
0.13	-8.92594		0.13	19.6414		0.54	2.33397e-06		0.85	2.72263e-06
0.14	-9.14667		0.14	22.0687		0.57	2.21148e-06		0.88	2.57696e-07
0.15	-5.1105		0.15	21.5637		0.62	1.03671e-06		0.94	4.47706e-06
0.16	-1.59077		0.16	17.6921		0.67	4.32388e-06		0.98	2.5921e-06
0.17	-1.89442		0.17	16.5408		0.7	3.85962e-06		1.06	1.72803e-06
0.18	-21.9591		0.18	22.819		0.73	2.95878e-06		1.11	9.54076e-06
0.19	-25.8796		0.19	21.9161		0.77	3.02031e-07		1.16	7.89859e-06
0.2	-1.16519		0.2	20.494		0.84	5.29659e-06		1.23	1.53123e-06
0.21	-6.40903		0.21	23.8461		0.86	0.000516037		1.28	6.49614e-05
0.22	-9.63606		0.22	26.6528		0.88	0.000260898		1.35	1.18495e-05
0.23	-7.09645		0.23	27.2406		0.91	4.58991e-06		1.42	9.62703e-06
0.24	-0.08427		0.24	25.9373		0.94	6.59689e-06		1.48	1.39224e-06
0.25	-1.99366		0.25	27.3918		0.96	1.989e-06		1.54	5.01462e-07
0.26	-8.61827		0.26	32.3961		1.01	3.41371e-06		1.56	1.05444e-05
0.27	-2.46841		0.27	29.4044		1.03	2.469e-06		1.64	9.34626e-06
0.28	0.16373		0.28	27.9472		1.09	2.13877e-06		1.76	5.23367e-06
0.29	0.48101		0.29	29.5615		1.13	1.16773e-05		1.8	1.66169e-05
0.3	-12.3523		0.3	28.296		1.16	1.412e-06		1.85	1.21527e-05
0.31	-7.25034		0.31	30.5896		1.2	5.26097e-05		1.89	9.08717e-06
0.32	3.24994		0.32	28.2205		1.22	2.74934e-05		2.03	8.90618e-06
0.33	2.55928		0.33	29.2232		1.24	1.90656e-06		2.08	4.76341e-06
0.34	-3.65596		0.34	32.9528		1.28	5.70134e-06		2.14	6.21499e-06
0.35	-3.95603		0.35	33.231		1.32	2.39121e-06		2.18	3.23505e-06
0.36	-0.92167		0.36	34.9524		1.36	2.13011e-06		2.22	3.07322e-06
0.37	2.08497		0.37	31.4708		1.41	1.25133e-05		2.3	8.31318e-06
0.38	-3.76604		0.38	30.6466		1.45	1.61358e-05		2.35	5.4232e-06
0.39	-3.89121		0.39	37.9752		1.49	7.95397e-07		2.38	1.07913e-05
0.4	3.38931		0.4	41.824		1.53	1.75722e-06		2.43	2.14484e-06
0.41	3.26134		0.41	39.3811		1.58	2.26925e-06		2.51	8.0496e-06
0.42	1.61044		0.42	33.5687		1.61	2.22926e-05		2.61	4.72849e-05
0.43	-4.97997		0.43	35.9419		1.66	8.90882e-06		2.68	1.06523e-05
0.44	3.36528		0.44	40.2634		1.69	4.13659e-06		2.81	6.88065e-06
0.45	5.32441		0.45	32.8132		1.74	3.76076e-06		2.87	1.02655e-05
0.46	6.48391		0.46	30.0428		1.78	9.64113e-05		2.96	4.04104e-06
0.47	5.90634		0.47	35.3569		1.82	8.34542e-06		2.99	2.25067e-06
0.48	2.96708		0.48	32.9902		1.87	1.98258e-05		3.17	2.84445e-05
0.49	12.8837		0.49	31.9515		1.91	1.08825e-06		3.26	2.64472e-05
0.5	10.8738		0.5	32.0452		1.95	1.15235e-05		3.31	9.7916e-06
0.51	4.02343		0.51	30.696		1.97	1.06788e-05		3.34	3.49366e-05
0.52	4.42118		0.52	40.8524		2.02	2.16626e-05		3.39	1.50069e-05
0.53	10.5198		0.53	38.7226		2.08	2.22144e-05		3.43	2.74895e-06
0.54	13.2037		0.54	34.2974		2.11	1.2869e-05		3.56	1.60488e-05
0.55	8.25304		0.55	35.6663		2.17	7.19621e-06		3.63	8.88039e-06
0.56	10.3372		0.56	42.4767		2.2	1.20735e-05		3.72	0.00275541
0.57	16.8671		0.57	38.061		2.23	2.00589e-07		3.74	4.22423e-06
0.58	16.5857		0.58	37.4763		2.27	3.54049e-06		3.82	7.78698e-07
0.59	9.05905		0.59	38.0429		2.29	8.93734e-07		3.84	0.00274744
0.6	8.1642		0.6	39.0172		2.32	1.76759e-05		3.92	0.002704
0.61	13.8305		0.61	40.7414		2.35	5.87202e-06		3.96	6.4413e-07
0.62	18.0997		0.62	38.1823		2.37	6.60488e-06		3.99	4.23012e-05
0.63	15.415		0.63	39.7983		2.4	6.14507e-07		4.09	3.56422e-06
0.64	11.6761		0.64	43.4965		2.49	0.000154343		4.21	3.5292e-05
0.65	17.1236		0.65	45.7169		2.52	0.000135518		4.29	1.68595e-05
0.66	18.0241		0.66	39.3503		2.54	6.00836e-05		4.38	1.35113e-06
0.67	19.1149		0.67	43.1918		2.57	9.80153e-06		4.41	7.02941e-05
0.68	13.4744		0.68	46.8249		2.61	1.16153e-05		4.47	6.65865e-05
0.69	20.4391		0.69	47.0069		2.63	1.00808e-05		4.51	3.23598e-05
0.7	21.7277		0.7	44.2693		2.65	4.76779e-05		4.56	2.24212e-05
0.71	15.1103		0.71	47.8535		2.7	2.75272e-05		4.66	5.30037e-06
0.72	12.96		0.72	44.5125		2.74	4.28666e-06		4.7	7.34933e-06
0.73	22.9391		0.73	55.302		2.79	2.5526e-06		4.75	4.5575e-06
0.74	18.3765		0.74	50.3709		2.82	7.46411e-06		4.83	2.40734e-05
0.75	23.223		0.75	44.0415		2.86	0.00118694		4.97	1.77273e-05
0.76	25.1541		0.76	45.623		2.88	0.00121056		5.08	4.18381e-06
0.77	28.7014		0.77	53.9429		2.91	1.38704e-05		5.16	0.000101485
0.78	28.0226		0.78	45.6854		2.95	1.53891e-05		5.21	1.86178e-05
0.79	25.5154		0.79	45.0041		2.99	0.000487014		5.25	5.5923e-05
0.8	25.1551		0.8	57.4665		3.03	2.13007e-05		5.3	5.94632e-05
0.81	26.5654		0.81	52.2886		3.06	0.000458229		5.33	2.04872e-06
0.82	30.8863		0.82	50.0021		3.08	0.000194952		5.38	2.3739e-05
0.83	33.0902		0.83	53.1328		3.13	3.76779e-05		5.41	4.77958e-06
0.84	36.7877		0.84	52.9095		3.16	6.15938e-05		5.46	7.28786e-06
0.85	32.5114		0.85	55.2386		3.19	9.71362e-06		5.52	3.20936e-05
0.86	37.0228		0.86	55.2287		3.24	9.96624e-05		5.57	1.88633e-05
0.87	30.946		0.87	53.3217		3.29	5.65121e-05		5.65	8.64892e-05
0.88	31.0604		0.88	57.9965		3.31	0.0010918		5.72	6.47541e-05
0.89	26.0131		0.89	54.0996		3.33	0.000905893		5.76	8.19027e-06
0.9	35.9865		0.9	51.1001		3.35	0.00026214		5.8	1.14436e-05
0.91	41.836		0.91	55.2272		3.37	3.9382e-05		5.91	6.40749e-06
0.92	36.3506		0.92	55.6159		3.39	0.000452737		5.95	4.42555e-06
0.93	40.7005		0.93	62.1462		3.41	0.000451754		6.07	2.54183e-05
0.94	43.6171		0.94	69.2832		3.45	0.000238178		6.14	6.94381e-06
0.95	38.7507		0.95	58.468		3.47	2.80452e-05		6.25	2.8791e-06
0.96	46.1664		0.96	67.1702		3.49	0.000337435		6.27	1.20579e-05
0.97	43.9473		0.97	64.5403		3.53	0.000261598		6.36	6.95689e-06
0.98	42.0529		0.98	69.2345		3.56	0.000256918		6.43	1.69932e-05
0.99	40.9432		0.99	60.883		3.58	0.000159384		6.45	5.39754e-06
1	37.3781		1	60.7197		3.62	2.3182e-05		6.61	1.94577e-05
1.01	46.3174		1.01	65.4482		3.65	0.000118138		6.7	8.62289e-06
1.02	42.1213		1.02	71.9203		3.68	5.31427e-05		6.72	1.56291e-05
1.03	46.9686		1.03	60.2406		3.71	3.45478e-06		6.79	1.4416e-05
1.04	40.8813		1.04	56.7307		3.74	2.09769e-05		6.89	1.90262e-06
1.05	35.7125		1.05	57.2867		3.76	7.25959e-06		6.99	7.23786e-06
1.06	39.1518		1.06	63.8358		3.78	5.34612e-06		7.06	1.52014e-05
1.07	42.6802		1.07	60.704		3.82	0.000607456		7.1	0.000139325
1.08	46.5125		1.08	56.9936		3.85	0.000187393		7.19	7.12694e-05
1.09	47.3956		1.09	61.9442		3.87	0.000281669		7.24	6.52587e-05
1.1	41.1667		1.1	67.657		3.91	1.34811e-05		7.36	5.37857e-06
1.11	44.8375		1.11	73.8287		3.93	7.47162e-06		7.4	1.18933e-05
1.12	47.3293		1.12	60.6962		3.98	5.23743e-05		7.46	9.77424e-06
1.13	47.8695		1.13	79.668		4.04	0.00101117		7.48	8.27026e-06
1.14	47.6202		1.14	81.8761		4.07	0.000537771		7.52	7.30655e-06
1.15	44.3038		1.15	70.6123		4.1	1.09511e-05		7.61	3.11763e-05
1.16	49.0048		1.16	72.2026		4.13	2.03963e-05		7.66	1.44605e-05
1.17	43.0587		1.17	65.2486		4.15	5.47291e-06		7.7	1.02025e-05
1.18	42.7332		1.18	71.9828		4.25	2.5881e-05		7.73	9.24196e-06
1.19	48.3105		1.19	70.5434		4.27	0.000478955		7.81	1.57035e-05
1.2	52.2578		1.2	59.0047		4.33	0.000427067		7.86	3.89614e-06
1.21	46.2574		1.21	65.4123		4.35	0.000237221		7.94	9.14063e-06
1.22	47.5856		1.22	68.8754		4.37	7.42325e-06		7.97	2.72434e-06
1.23	45.9362		1.23	75.4595		4.4	3.04765e-05		8	6.05797e-06
1.24	52.0037		1.24	64.8335		4.44	0.000297636		8.06	5.27188e-08
1.25	50.5866		1.25	81.2322		4.47	0.000147768		8.09	4.6742e-06
1.26	48.4948		1.26	83.8059		4.53	3.14681e-05		8.15	1.34913e-05
1.27	55.7774		1.27	83.1059		4.58	4.67305e-06		8.21	9.06442e-06
1.28	57.7054		1.28	83.3821		4.61	2.46969e-05		8.26	5.61279e-06
1.29	54.7409		1.29	77.3652		4.64	2.64289e-05		8.3	2.00464e-05
1.3	46.8431		1.3	86.8979		4.66	2.34268e-05		8.39	1.86878e-05
1.31	50.5781		1.31	86.6091		4.69	1.94563e-05		8.47	1.07335e-05
1.32	57.1062		1.32	90.6548		4.72	1.11862e-05		8.55	8.57074e-06
1.33	55.1734		1.33	85.0725		4.75	4.03801e-05		8.68	2.73305e-05
1.34	49.793		1.34	87.656		4.78	4.77465e-06		8.71	6.801e-06
1.35	54.3809		1.35	87.779		4.82	3.82782e-05		8.73	3.57078e-06
1.36	61.278		1.36	74.9277		4.86	1.32161e-05		8.84	1.84692e-05
1.37	61.0785		1.37	75.174		4.94	0.000104527		8.88	4.35308e-06
1.38	51.6725		1.38	77.702		4.99	5.52663e-05		8.94	1.01355e-05
1.39	49.8834		1.39	94.8352		5.03	6.57623e-05		8.98	1.59361e-05
1.4	57.9308		1.4	86.3625		5.06	4.08677e-05		9.06	1.17346e-05
1.41	61.6458		1.41	87.0868		5.16	2.52767e-05		9.09	9.53032e-06
1.42	57.4433		1.42	89.7097		5.19	0.000214521		9.21	8.17149e-06
1.43	59.4152		1.43	86.3815		5.28	0.000253256		9.31	1.09971e-05
1.44	60.3728		1.44	79.4029		5.31	9.92963e-05		9.37	5.10912e-06
1.45	64.8262		1.45	87.2825		5.36	7.23085e-05		9.46	8.50034e-07
1.46	58.2723		1.46	77.6426		5.46	0.000298423		9.55	1.05672e-05
1.47	53.4487		1.47	88.9965		5.49	0.000311405		9.7	1.91827e-05
1.48	60.3359		1.48	90.2473		5.53	0.000119669		9.76	2.40172e-05
1.49	63.5558		1.49	85.085		5.57	0.00010344		9.8	1.58395e-05
1.5	61.6669		1.5	73.3971		5.59	6.74371e-05		9.83	1.44481e-05
1.51	59.9946		1.51	68.9841		5.62	9.6757e-05		9.98	8.2035e-05
1.52	65.5027		1.52	84.5771		5.66	9.77485e-06		10.04	1.40769e-05
1.53	70.1987		1.53	84.698		5.68	1.96148e-05		10.09	4.36321e-06
1.54	69.7146		1.54	89.0918		5.71	0.000102983		10.15	4.56464e-06
1.55	61.1822		1.55	85.3917		5.74	8.66974e-05		10.21	1.10899e-05
1.56	60.7485		1.56	93.137		5.79	0.00310087		10.23	3.90793e-06
1.57	68.0353		1.57	80.8503		5.81	0.00156409		10.28	7.97403e-06
1.58	70.9129		1.58	69.094		5.84	5.54589e-05		10.31	4.83219e-06
1.59	65.6398		1.59	83.9368		5.87	6.53308e-06		10.36	2.46147e-06
1.6	66.7054		1.6	90.0065		5.9	4.05658e-05		10.45	0.000226695
1.61	73.7011		1.61	87.807		5.95	1.52999e-05		10.51	0.000195972
1.62	72.9591		1.62	89.4883		5.97	0.000117135		10.63	2.3122e-05
1.63	67.7887		1.63	90.6018		6	5.65065e-05		10.77	4.76225e-05
1.64	56.8913		1.64	92.8461		6.05	4.65129e-05		10.88	1.08067e-05
1.65	58.1811		1.65	79.4804		6.08	5.88548e-06		10.92	3.45241e-06
1.66	65.8882		1.66	89.9512		6.14	2.06152e-05		10.97	9.45527e-06
1.67	61.9885		1.67	95.2389		6.18	1.15232e-05		10.99	2.71801e-05
1.68	56.4478		1.68	97.7961		6.22	2.26193e-05		11.06	2.01269e-05
1.69	66.7273		1.69	93.2554		6.33	0.000314519		11.09	3.12869e-05
1.7	66.4579		1.7	91.7485		6.37	0.000335852		11.14	2.3752e-05
1.71	66.0694		1.71	96.0544		6.46	0.000116089		11.23	3.30266e-06
1.72	58.5099		1.72	97.0549		6.54	2.91557e-05		11.27	1.94771e-05
1.73	63.9813		1.73	95.6103		6.56	0.000121933		11.34	1.9789e-05
1.74	69.4032		1.74	94.2987		6.62	4.20822e-06		11.42	3.42719e-05
1.75	65.2432		1.75	94.4837		6.69	6.57976e-05		11.52	4.00515e-06
1.76	61.9789		1.76	95.8506		6.73	1.56904e-05		11.56	2.98971e-05
1.77	74.9284		1.77	94.9391		6.81	5.94804e-05		11.58	2.9277e-06
1.78	75.9421		1.78	94.4034		6.9	0.00163605		11.67	8.35894e-05
1.79	69.9358		1.79	94.5914		6.92	0.00109273		11.74	3.18658e-05
1.8	62.1387		1.8	96.294		6.96	0.000820113		11.79	1.39538e-05
1.81	62.1842		1.81	94.9576		6.99	0.000375504		11.86	3.98479e-06
1.82	65.599		1.82	93.1685		7.02	0.000186418		11.91	6.75668e-06
1.83	64.1912		1.83	96.7709		7.06	0.000127354		11.99	6.16301e-05
1.84	61.1641		1.84	97.3029		7.09	0.000227441		12.04	4.47104e-06
1.85	62.2863		1.85	103.623		7.11	0.000164002		12.22	0.000220199
1.86	67.1034		1.86	94.2517		7.13	0.000639446		12.32	4.11884e-05
1.87	67.4183		1.87	88.9646		7.17	0.000424353		12.42	5.12717e-05
1.88	57.1721		1.88	99.7468		7.21	9.89167e-05		12.44	6.62754e-06
1.89	55.9806		1.89	100.172		7.28	0.000176095		12.47	9.75311e-05
1.9	59.6168		1.9	91.0629		7.33	0.000259983		12.53	1.24571e-05
1.91	60.4725		1.91	94.7304		7.35	0.000135448		12.6	7.38716e-05
1.92	59.7285		1.92	101.74		7.39	9.27823e-05		12.65	2.87586e-05
1.93	60.3839		1.93	101.386		7.44	2.11399e-05		12.79	3.4202e-05
1.94	63.472		1.94	100.211		7.48	1.91538e-05		12.83	1.96682e-05
1.95	66.1181		1.95	98.869		7.52	0.000108329		12.87	0.000453152
1.96	60.6179		1.96	103.147		7.57	0.000129584		13.07	0.000382834
1.97	62.5175		1.97	100.188		7.65	0.000110434		13.11	1.29575e-05
1.98	61.9042		1.98	99.5472		7.7	5.2309e-05		13.19	1.43604e-05
1.99	63.3914		1.99	98.6172		7.72	3.1078e-05		13.33	0.000283782
2	64.1498		2	100.867		7.78	1.4269e-05		13.38	0.000268759
2.01	64.7262		2.01	101.963		7.82	0.000167833		13.49	0.000159327
2.02	67.5464		2.02	98.4189		7.88	0.000110857		13.54	7.92665e-06
2.03	64.9536		2.03	99.5364		7.92	1.59915e-05		13.63	2.36537e-05
2.04	64.559		2.04	98.5458		8	0.000224145		13.72	8.27214e-05
2.05	64.7926		2.05	101.631		8.04	6.62425e-05		13.76	5.19019e-05
2.06	68.2972		2.06	103.592		8.1	0.000121224		13.78	4.30699e-08
2.07	68.8531		2.07	104.416		8.15	3.96556e-05		13.94	2.30169e-05
2.08	74.6371		2.08	106.624		8.17	7.46755e-05		14.09	2.09412e-05
2.09	73.5675		2.09	103.148		8.19	8.5715e-06		14.16	1.72863e-05
2.1	69.3645		2.1	106.448		8.25	0.000481005		14.2	3.12151e-06
2.11	79.5744		2.11	101.645		8.29	0.000308585		14.27	2.50214e-05
2.12	75.7048		2.12	101.957		8.32	5.48386e-05		14.37	8.19186e-05
2.13	66.9273		2.13	103.121		8.38	0.000357864		14.48	3.38092e-05
2.14	69.2753		2.14	106.701		8.4	0.000180333		14.76	2.73811e-05
2.15	74.6173		2.15	99.089		8.48	0.000122052		14.82	2.97122e-06
2.16	79.4037		2.16	102.601		8.53	0.000155868		14.91	2.38459e-05
2.17	79.6636		2.17	106.057		8.56	6.48038e-05		14.96	4.6298e-05
2.18	75.562		2.18	107.531		8.6	6.39096e-05		15.09	1.18728e-05
2.19	78.2419		2.19	98.2953		8.69	0.00217451		15.19	3.31255e-05
2.2	84.137		2.2	109.175		8.71	0.00111549		15.31	7.51228e-05
2.21	80.9123		2.21	110.674		8.74	4.7634e-05		15.38	1.11051e-05
2.22	73.1897		2.22	110.797		8.8	3.42084e-05		15.43	3.57952e-05
2.23	83.0509		2.23	109.639		8.82	3.96187e-05		15.5	1.69793e-05
2.24	82.431		2.24	109.033		8.88	0.000145033		15.59	2.55548e-05
2.25	72.2803		2.25	102.928		8.91	0.000126677		15.61	2.32601e-05
2.26	74.4084		2.26	111.037		8.98	6.23408e-05		15.72	8.74821e-08
2.27	89.0349		2.27	108.368		9.04	0.000158492		15.93	4.14248e-05
2.28	84.5729		2.28	110.314		9.08	0.000277737		15.96	3.48154e-05
2.29	90.5009		2.29	110.945		9.1	0.000304656		16.19	1.4874e-05
2.3	83.3926		2.3	113.524		9.12	0.000102623		16.21	3.13898e-05
2.31	92.671		2.31	112.222		9.19	0.000298787		16.36	4.95919e-05
2.32	93.6974		2.32	110.467		9.28	0.000196191		16.4	1.07332e-05
2.33	87.6597		2.33	107.145		9.31	7.66592e-05		16.51	0.000256513
2.34	82.1203		2.34	107.458		9.35	7.17106e-05		16.58	6.41102e-05
2.35	88.5149		2.35	111.188		9.39	1.30886e-05		16.64	4.88217e-06
2.36	87.2412		2.36	110.361		9.44	0.000101435		16.76	3.62582e-05
2.37	91.6303		2.37	115.049		9.49	6.43693e-05		16.87	5.46129e-05
2.38	90.0714		2.38	117.603		9.55	9.54365e-05		16.9	4.61075e-05
2.39	93.7417		2.39	115.773		9.6	0.0895413		16.98	3.56782e-05
2.4	102.857		2.4	110.394		9.64	0.0447562		17.05	5.01424e-06
2.41	93.9976		2.41	108.473		9.66	0.000143917		17.09	1.74629e-05
2.42	82.2309		2.42	110.326		9.69	0.000168089		17.13	5.39744e-05
2.43	91.795		2.43	115.758		9.72	9.55625e-05		17.16	2.68825e-05
2.44	97.8746		2.44	113.426		9.75	1.56341e-06		17.25	4.90939e-06
2.45	99.1092		2.45	109.78		9.78	3.13497e-05		17.3	2.5092e-06
2.46	100.551		2.46	114.751		9.85	9.27152e-05		17.36	5.80157e-05
2.47	105.901		2.47	108.128		9.93	5.27607e-05		17.43	5.69563e-05
2.48	111.095		2.48	109.354		9.96	1.062e-05		17.47	0.000342429
2.49	116.657		2.49	110.539		10.06	0.000433675		17.52	2.12279e-05
2.5	93.6766		2.5	113.915		10.08	0.00040072		17.67	0.000159685
2.51	89.1128		2.51	116.198		10.16	7.74925e-05		17.78	4.33501e-05
2.52	109.489		2.52	112.735		10.18	6.89347e-05		17.83	9.83506e-06
2.53	97.5016		2.53	118.053		10.21	0.00225878		17.99	9.10307e-05
2.54	98.8405		2.54	116.58		10.24	0.00112804		18.13	3.02248e-05
2.55	92.6831		2.55	119.924		10.3	0.0128357		18.21	3.11643e-05
2.56	94.8383		2.56	117.106		10.34	0.00644729		18.23	1.81652e-07
2.57	108.033		2.57	118.056		10.39	7.73847e-05		18.29	0.000224789
2.58	107.168		2.58	118.222		10.5	0.000123334		18.37	2.69759e-05
2.59	96.5286		2.59	119.334		10.54	0.00023566		18.47	1.76819e-05
2.6	95.2765		2.6	118.109		10.6	0.000148264		18.5	2.21996e-05
2.61	119.078		2.61	118.62		10.64	0.000579224		18.57	2.97753e-05
2.62	113.499		2.62	115.246		10.71	0.000332311		18.63	0.000824556
2.63	120.199		2.63	121.483		10.8	5.61858e-05		18.75	0.000321852
2.64	110.825		2.64	119.504		10.89	5.17513e-05		18.79	7.12167e-05
2.65	125.446		2.65	117.312		10.92	0.000336387		18.87	3.346e-05
2.66	124.125		2.66	115.615		10.97	9.34813e-05		18.98	0.000101971
2.67	121.21		2.67	123.12		11.01	0.00014979		19.05	0.000115416
2.68	122.419		2.68	123.931		11.04	0.000511009		19.16	0.000391371
2.69	125.845		2.69	116.979		11.09	0.000695514		19.22	6.88129e-06
2.7	127.526		2.7	126.151		11.15	0.00065373		19.26	0.000504347
2.71	124.808		2.71	122.505		11.19	0.000183602		19.3	2.04466e-05
2.72	129.708		2.72	115.797		11.23	0.000139609		19.37	1.23641e-05
2.73	130.255		2.73	114.054		11.28	0.00103693		19.51	0.000935581
2.74	136.404		2.74	109.738		11.3	0.000473583		19.63	0.000182713
2.75	131.438		2.75	123.433		11.33	0.000253062		19.74	0.000446175
2.76	128.898		2.76	124.07		11.39	0.000369059		19.9	0.000143261
2.77	136.517		2.77	113.605		11.42	0.00917439		19.92	1.13781e-05
2.78	140.362		2.78	118.163		11.47	0.00447937		19.99	2.26175e-05
2.79	141.419		2.79	124.827		11.54	5.87066e-05		20.01	1.89548e-05
2.8	139.488		2.8	119.289		11.58	9.44134e-05		20.05	1.89145e-05
2.81	143.089		2.81	121.239		11.6	0.00399052		20.13	1.98263e-05
2.82	147.129		2.82	119.995		11.63	0.00248742		20.19	0.000189978
2.83	146.078		2.83	127.019		11.67	1.90811e-05		20.21	3.63017e-05
2.84	144.47		2.84	127.72		11.71	0.00186738		20.26	2.19952e-05
2.85	144.916		2.85	124.023		11.74	0.000972382		20.33	8.55392e-05
2.86	150.727		2.86	128.293		11.8	0.000937827		20.36	2.33635e-05
2.87	150.625		2.87	128.477		11.89	0.000829468		20.38	8.57472e-07
2.88	150.744		2.88	124.837		11.96	0.000276264		20.46	1.0005e-05
2.89	149.168		2.89	123.136		12.03	0.000228078		20.61	0.000188626
2.9	155.49		2.9	130.561		12.07	0.000133426		20.67	1.10707e-05
2.91	161.15		2.91	131.471		12.1	0.000239961		20.75	1.75155e-05
2.92	157.292		2.92	128.621		12.14	0.00166734		20.83	3.10702e-06
2.93	155.638		2.93	121.988		12.23	0.000988257		20.86	3.82369e-05
2.94	159.834		2.94	115.642		12.26	0.00128874		20.9	3.69259e-05
2.95	163.201		2.95	118.802		12.28	0.000587319		20.99	5.02494e-05
2.96	162.903		2.96	122.786		12.35	2.5601e-05		21.11	0.000179944
2.97	160.281		2.97	119.233		12.4	3.87972e-05		21.27	0.000120781
2.98	165.371		2.98	115.542		12.44	0.00169122		21.32	2.86882e-05
2.99	172.007		2.99	119.939		12.46	0.000875767		21.39	0.000339645
3	165.34		3	118.11		12.48	0.0252934		21.56	3.20877e-05
3.01	161.873		3.01	114.566		12.5	0.0126741		21.74	8.57485e-05
3.02	160.52		3.02	112.817		12.56	0.00106354		21.83	9.32842e-05
3.03	167.935		3.03	116.272		12.61	8.1435e-05		21.89	7.31729e-05
3.04	163.698		3.04	121.785		12.65	7.80829e-05		21.99	0.000115698
3.05	168.191		3.05	132.608		12.67	9.97355e-06		22.06	8.08328e-05
3.06	171.049		3.06	131.109		12.73	0.000886824		22.15	1.68831e-05
3.07	170.075		3.07	121.807		12.77	0.000411119		22.2	8.07233e-06
3.08	170.611		3.08	129.413		12.81	23.9938		22.23	1.70388e-05
3.09	169.076		3.09	132.106		12.85	23.9371		22.41	0.000526887
3.1	171.275		3.1	125.523		12.89	23.9127		22.52	0.00013594
3.11	171.451		3.11	127.12		12.92	0.000349577		22.59	0.000247387
3.12	173.873		3.12	130.426		12.97	0.000168557		22.61	0.000145237
3.13	174.82		3.13	132.048		13.05	23.9076		22.66	4.3463e-05
3.14	173.31		3.14	133.883		13.12	23.8998		22.71	0.00840391
3.15	176.181		3.15	129.888		13.16	23.8395		22.79	7.19074e-05
3.16	177.484		3.16	128.98		13.21	0.0350135		22.85	4.76396e-05
3.17	174.61		3.17	129.74		13.25	0.0180853		22.95	0.000185595
3.18	173.957		3.18	128.685		13.27	0.00018569		23.01	0.000616415
3.19	181.961		3.19	130.88		13.33	23.8037		23.06	3.03841e-05
3.2	179.994		3.2	132.693		13.4	0.000228736		23.15	2.50287e-05
3.21	179.355		3.21	137.831		13.42	23.8035		23.28	0.000528822
3.22	185.116		3.22	135.28		13.48	23.8005		23.34	0.000630207
3.23	194.05		3.23	131.531		13.55	23.8005		23.43	1.1779e-05
3.24	195.801		3.24	132.688		13.59	23.7991		23.48	3.24565e-05
3.25	194.263		3.25	132.87		13.62	23.7986		23.55	4.05889e-05
3.26	184.877		3.26	134.612		13.71	3.3261e-05		23.66	7.006e-05
3.27	186.007		3.27	128.684		13.82	23.7778		23.75	0.000603674
3.28	189.158		3.28	139.88		13.93	0.000241893		23.87	0.000144029
3.29	191.805		3.29	136.67		13.95	23.7695		23.89	3.38185e-05
3.3	189.506		3.3	134.575		14.01	0.00470575		23.92	4.17415e-05
3.31	197.091		3.31	136.76		14.06	23.7602		23.99	7.33555e-05
3.32	194.921		3.32	126.363		14.14	23.7133		24.06	5.08069e-06
3.33	195.819		3.33	134.97		14.21	3.67307e-06		24.12	0.000102645
3.34	193.874		3.34	140.17		14.25	23.6828		24.17	0.000526527
3.35	194.393		3.35	130.912		14.29	0.00131693		24.22	0.000506135
3.36	193.002		3.36	139.533		14.33	0.000922403		24.26	8.08334e-06
3.37	194.832		3.37	134.397		14.35	0.000264307		24.3	1.10863e-05
3.38	192.741		3.38	133.396		14.39	23.6808		24.36	0.00353464
3.39	195.662		3.39	135.129		14.44	23.6619		24.39	3.53506e-05
3.4	191.34		3.4	126.586		14.46	23.6619		24.48	4.12679e-05
3.41	194.24		3.41	139.111		14.49	23.6395		24.55	4.89773e-05
3.42	192.201		3.42	131.515		14.56	23.6355		24.6	1.79731e-05
3.43	192.13		3.43	137.175		14.62	23.6348		24.76	0.000220642
3.44	193.46		3.44	135.279		14.68	0.000875474		24.83	5.86735e-05
3.45	193.471		3.45	129.162		14.7	23.6205		24.87	5.77858e-05
3.46	192.943		3.46	140.101		14.79	23.6186		24.95	0.000239267
3.47	197.358		3.47	137.358		14.82	23.6178		25.03	0.000171951
3.48	193.345		3.48	135.13		14.84	23.6169		25.15	2.1459e-05
3.49	205.519		3.49	134.883		14.88	0.000151053		25.18	0.000379991
3.5	198.713		3.5	142.848		14.92	0.000129186		25.26	0.000268989
3.51	201.417		3.51	135.406		14.95	23.6159		25.39	2.72371e-05
3.52	202.025		3.52	131.751		15.01	0.000329889		25.45	1.89588e-05
3.53	205		3.53	137.046		15.03	22.7877		25.51	8.58e-05
3.54	199.81		3.54	139.308		15.08	22.7839		25.58	1.66091e-05
3.55	201.861		3.55	137.138		15.12	22.7831		25.66	5.86754e-05
3.56	204.106		3.56	138.591		15.18	17.8678		25.71	5.76534e-05
3.57	202.539		3.57	136.719		15.2	17.8589		25.77	0.000645394
3.58	203.576		3.58	142.704		15.26	17.8578		25.86	0.00011528
3.59	203.329		3.59	138.574		15.3	17.8561		25.93	0.000360715
3.6	197.865		3.6	134.292		15.35	17.8557		25.98	0.000253272
3.61	209.46		3.61	135.923		15.41	17.851		26.1	0.000215904
3.62	210.061		3.62	136.839		15.49	9.39628e-05		26.2	1.96816e-05
3.63	208.654		3.63	141.898		15.51	17.8509		26.31	4.75318e-05
3.64	206.511		3.64	132.046		15.53	17.8508		26.34	4.09905e-06
3.65	225.953		3.65	131.345		15.57	17.8508		26.45	0.000133237
3.66	221.837		3.66	139.648		15.59	17.8507		26.51	0.00011737
3.67	216.836		3.67	136.709		15.62	0.000484384		26.55	0.00453169
3.68	219.601		3.68	133.422		15.65	0.000485671		26.58	7.97055e-06
3.69	217.797		3.69	136.998		15.7	0.00129045		26.72	5.95417e-05
3.7	227.242		3.7	138.089		15.72	0.000475657		26.87	3.51247e-05
3.71	235.359		3.71	145.178		15.76	0.000213242		26.96	7.61124e-05
3.72	231.771		3.72	145.472		15.8	0.000122389		27.04	0.000149842
3.73	242.933		3.73	134.112		15.82	17.8482		27.12	2.37906e-05
3.74	247.042		3.74	137.381		15.87	17.8443		27.23	0.000660868
3.75	232.245		3.75	136.012		15.89	17.8442		27.37	5.4541e-05
3.76	244.967		3.76	141.947		15.96	17.8223		27.5	0.000181863
3.77	230.075		3.77	138.234		15.98	17.8222		27.55	3.81353e-05
3.78	249.58		3.78	136.908		16.02	0.000232876		27.63	2.03643e-05
3.79	247.518		3.79	136.656		16.05	17.8217		27.66	4.82561e-05
3.8	229.155		3.8	133.986		16.07	17.8216		27.8	0.000167271
3.81	252.281		3.81	138.495		16.1	17.8212		27.92	7.06846e-05
3.82	254.213		3.82	142.236		16.22	17.821		27.97	0.000357088
3.83	252.422		3.83	138.354		16.31	17.5438		28.06	4.57848e-05
3.84	251.935		3.84	142.823		16.44	0.00507139		28.18	0.000873176
3.85	253.485		3.85	142.527		16.48	0.000881406		28.41	8.39515e-05
3.86	253.23		3.86	134.496		16.54	0.0017905		28.45	8.13692e-06
3.87	253.941		3.87	139.027		16.56	0.00158818		28.52	1.23949e-05
3.88	250.694		3.88	137.709		16.59	0.00057706		28.57	6.31359e-05
3.89	257.587		3.89	136.112		16.64	0.00120395		28.7	4.71123e-05
3.9	258.522		3.9	140.235		16.68	0.000567965		28.83	0.00534687
3.91	261.815		3.91	137.047		16.72	17.5313		28.95	6.63789e-06
3.92	254.972		3.92	137.058		16.78	16.6109		29	4.06342e-05
3.93	258.928		3.93	136.212		16.81	0.000120026		29.08	2.14081e-05
3.94	255.804		3.94	134.911		16.84	16.6104		29.11	0.0105353
3.95	254.803		3.95	140.485		16.88	1.19933e-05		29.23	6.521e-05
3.96	261.928		3.96	140.955		16.9	0.00383287		29.42	0.010414
3.97	262.205		3.97	135.433		16.92	0.00215514		29.45	0.000148964
3.98	268.034		3.98	139.722		16.97	5.34588e-05		29.53	7.77823e-05
3.99	267.026		3.99	141.627		17.01	0.000545836		29.65	0.000200716
4	268.397		4	139.977		17.05	0.000325858		29.68	2.38334e-06
4.01	269.506		4.01	137.617		17.1	16.606		29.81	8.2042e-05
4.02	272.597		4.02	136.597		17.14	0.000586245		29.86	2.20913e-06
4.03	272.851		4.03	136.237		17.19	0.000374245		29.9	0.000114534
4.04	278.677		4.04	139.943		17.23	0.00014501		29.99	0.000191293
4.05	275.516		4.05	145.274		17.27	0.000289472		30.06	2.0904e-06
4.06	275.296		4.06	140.846		17.3	16.6043		30.13	0.000132432
4.07	275.75		4.07	138.635		17.35	0.000579333		30.17	5.25355e-05
4.08	271.77		4.08	135.783		17.38	0.000243807		30.35	7.53587e-06
4.09	274.087		4.09	139.993		17.42	0.000242146		30.42	0.000147943
4.1	281.753		4.1	137.54		17.46	16.6035		30.51	0.00218941
4.11	279.979		4.11	135.002		17.52	3.82537e-05		30.57	0.00212914
4.12	283.822		4.12	134.174		17.57	1.79537e-05		30.59	0.000772197
4.13	292.37		4.13	142		17.61	16.6034		30.65	4.6469e-05
4.14	292.058		4.14	136.555		17.7	0.000216946		30.69	3.82339e-05
4.15	296.343		4.15	143.035		17.76	0.000220327		30.78	0.0002332
4.16	289.198		4.16	139.168		17.78	16.6028		30.89	0.000109552
4.17	284.245		4.17	142.277		17.84	16.5229		31.03	0.000224173
4.18	281.397		4.18	140.872		17.9	0.068197		31.11	1.50359e-05
4.19	281.375		4.19	138.262		17.94	0.0679457		31.2	8.17668e-05
4.2	276.647		4.2	140.021		17.97	0.00131561		31.23	5.5607e-05
4.21	280.225		4.21	141.065		18.02	0.000259091		31.35	0.000175369
4.22	283.055		4.22	137.322		18.07	4.35154e-05		31.42	3.72253e-05
4.23	287.52		4.23	133.734		18.14	0.0647725		31.5	0.000106898
4.24	293.645		4.24	141.456		18.18	0.0358962		31.61	7.48144e-05
4.25	298.421		4.25	140.349		18.22	0.0179602		31.68	1.82142e-05
4.26	296.116		4.26	144.259		18.27	0.000113061		31.71	2.73945e-05
4.27	303.179		4.27	136.664		18.3	0.0286794		31.75	2.2181e-05
4.28	302.228		4.28	138.658		18.39	0.0248048		31.9	7.98544e-05
4.29	300.661		4.29	139.782		18.42	0.000629221		32.06	0.000134213
4.3	297.904		4.3	136.295		18.45	0.00316669		32.15	7.97853e-05
4.31	295.577		4.31	146.451		18.47	8.55657e-05		32.36	6.96248e-05
4.32	301.462		4.32	142.797		18.51	0.00307097		32.52	6.13618e-05
4.33	301.718		4.33	141.882		18.54	0.00148651		32.61	1.35316e-05
4.34	296.788		4.34	145.017		18.58	0.0191835		32.67	0.00026178
4.35	297.826		4.35	139.867		18.64	0.0190139		32.73	8.45969e-06
4.36	294.167		4.36	137.887		18.66	0.000101656		32.86	0.000257692
4.37	301.018		4.37	140.416		18.68	0.0188258		33.02	0.000512055
4.38	298.36		4.38	142.888		18.73	0.0176791		33.07	0.00116807
4.39	305.138		4.39	140.005		18.77	0.00943737		33.1	0.000843553
4.4	309.932		4.4	143.964		18.81	0.00112084		33.17	7.08358e-05
4.41	307.239		4.41	145.492		18.88	0.000141332		33.31	0.000185625
4.42	310.306		4.42	142.959		18.94	0.000904678		33.41	0.000402521
4.43	314.189		4.43	138.551		18.96	0.000550043		33.58	7.36795e-05
4.44	318.097		4.44	143.1		19	0.000312592		33.77	5.69398e-05
4.45	311.81		4.45	146.19		19.03	0.000146156		33.93	9.27246e-05
4.46	313.467		4.46	144.451		19.05	8.09404e-05		34.08	1.01549e-05
4.47	314.388		4.47	145.212		19.12	2.42971e-05		34.15	8.53399e-05
4.48	310.015		4.48	141.086		19.17	0.00350192		34.22	7.29822e-05
4.49	310.387		4.49	145.003		19.2	0.00123908		34.36	1.16841e-05
4.5	312.906		4.5	144.272		19.24	0.000486611		34.56	0.000437998
4.51	314.649		4.51	145.074		19.3	8.77431e-05		34.64	0.000162922
4.52	325.837		4.52	139.521		19.32	0.000174248		34.71	3.08118e-05
4.53	326.856		4.53	145.597		19.4	16.4544		34.74	6.55855e-06
4.54	319.595		4.54	147.582		19.42	16.4544		34.91	0.000767345
4.55	318.872		4.55	146.083		19.47	16.4542		34.97	0.000703509
4.56	326.5		4.56	147.269		19.56	16.4485		35.03	2.1227e-05
4.57	328.665		4.57	141.554		19.66	2.27189e-05		35.08	0.000633779
4.58	333.656		4.58	147.784		19.68	0.000583497		35.13	0.000108819
4.59	331.244		4.59	141.968		19.72	1.03742e-05		35.17	1.99048e-05
4.6	339.471		4.6	143.272		19.79	0.000323981		35.19	3.59539e-05
4.61	340.381		4.61	151.505		19.87	3.39015e-05		35.37	7.82126e-05
4.62	334.773		4.62	145.843		19.91	1.62097e-05		35.45	7.6153e-05
4.63	336.608		4.63	148.568		19.93	4.10756e-05		35.53	0.000316465
4.64	348.402		4.64	148.14		19.97	3.80941e-05		35.59	0.000486561
4.65	346.65		4.65	145.719		20	0.00142944		35.67	0.00562186
4.66	351.078		4.66	147.888		20.07	0.000315715		35.72	8.06501e-05
4.67	341.1		4.67	145.332		20.1	1.00017e-05		35.83	0.00189582
4.68	350.754		4.68	145.67		20.17	1.83542e-05		35.93	0.000991679
4.69	353.455		4.69	149.478		20.25	0.000250354		35.99	2.43118e-05
4.7	352.057		4.7	155.196		20.28	0.000175435		36.01	5.53563e-05
4.71	356.007		4.71	152.803		20.31	0.000916583		36.1	0.00641267
4.72	370.976		4.72	146.477		20.37	0.000560719		36.17	0.00117256
4.73	349.906		4.73	150.712		20.43	0.00027172		36.21	6.23576e-05
4.74	363.586		4.74	148.751		20.48	0.000309957		36.29	0.000628516
4.75	375.151		4.75	152.147		20.5	0.00104195		36.4	1.99186e-06
4.76	372.485		4.76	150.407		20.54	0.000821788		36.44	1.1278e-05
4.77	378.416		4.77	150.067		20.56	0.000465594		36.47	1.74591e-05
4.78	382.945		4.78	156.268		20.58	2.87431e-05		36.58	7.24234e-05
4.79	378.24		4.79	154.498		20.64	16.4441		36.64	6.19368e-05
4.8	376.756		4.8	149.933		20.7	0.000199112		36.75	6.5183e-05
4.81	383.69		4.81	152.504		20.72	16.4429		36.84	0.000617236
4.82	387.786		4.82	154.117		20.8	16.4141		36.93	2.66999e-05
4.83	386.221		4.83	156.913		20.88	16.4141		37.09	0.00110955
4.84	385.205		4.84	155.638		20.91	0.000271119		37.27	0.000162173
4.85	375.553		4.85	153.366		20.95	0.000127139		37.3	2.97855e-06
4.86	383.982		4.86	157.324		21	16.4137		37.37	0.000152999
4.87	377.937		4.87	156.888		21.11	0.000247913		37.49	4.85169e-05
4.88	372.357		4.88	149.117		21.2	16.2		37.56	0.00022984
4.89	386.8		4.89	150.653		21.32	16.1931		37.66	0.000127924
4.9	396.153		4.9	152.422		21.39	0.000304407		37.78	3.31814e-05
4.91	398.01		4.91	156.212		21.41	0.000154526		37.9	0.00028785
4.92	402.966		4.92	157.109		21.43	0.000139403		38.03	0.000171767
4.93	406.513		4.93	154.09		21.48	16.192		38.07	3.55723e-05
4.94	410.136		4.94	154.028		21.52	16.1918		38.25	2.42656e-05
4.95	405.673		4.95	155.931		21.57	15.6277		38.39	5.74712e-05
4.96	399.009		4.96	154.007		21.63	15.6203		38.48	0.000932397
4.97	397.714		4.97	155.343		21.69	0.000152793		38.51	8.60366e-05
4.98	398.179		4.98	155.221		21.71	0.000117462		38.55	0.000180443
4.99	404.585		4.99	159.521		21.73	15.6187		38.69	5.783e-05
5	396.925		5	158.159		21.76	15.6172		38.73	1.55332e-05
5.01	403.099		5.01	152.842		21.8	0.000981762		38.9	6.22666e-05
5.02	406.322		5.02	150.993		21.82	0.000847052		38.94	0.00158206
5.03	416.457		5.03	154.987		21.84	0.00685735		39.01	0.00104865
5.04	416.281		5.04	153.835		21.88	0.00681538		39.07	0.000142133
5.05	413.325		5.05	152.893		21.92	0.00633032		39.16	6.1976e-05
5.06	416.467		5.06	154.175		21.94	0.00398661		39.18	7.35295e-05
5.07	408.495		5.07	157.665		21.97	0.00119028		39.36	0.000154396
5.08	407.639		5.08	160.792		22.07	0.000553714		39.45	7.50839e-06
5.09	400.576		5.09	156.146		22.18	15.607		39.58	0.00020153
5.1	412.696		5.1	152.898		22.22	15.6063		39.61	3.51671e-05
5.11	424.395		5.11	157.661		22.25	0.00094359		39.71	9.80768e-05
5.12	427.434		5.12	160.153		22.28	0.000691973		40.03	0.00452815
5.13	427.592		5.13	159.461		22.31	15.5925		40.08	0.000363945
5.14	429.431		5.14	159.14		22.34	15.5921		40.13	7.11501e-05
5.15	431.189		5.15	160.586		22.36	15.5919		40.23	0.0049038
5.16	431.543		5.16	161.397		22.44	15.5899		40.29	0.0001091
5.17	429.056		5.17	156.682		22.5	15.5866		40.42	0.00411172
5.18	430.207		5.18	150.997		22.58	15.5821		40.46	2.98843e-05
5.19	441.045		5.19	158.106		22.62	15.5761		40.56	6.74961e-05
5.2	440.844		5.2	156.211		22.67	0.000425853		40.65	1.45711e-05
5.21	441.522		5.21	157.66		22.71	15.5488		40.75	1.6233e-06
5.22	441.629		5.22	156.462		22.73	15.5478		40.81	9.17801e-06
5.23	443.322		5.23	162.811		22.77	0.000727122		40.86	1.00042e-05
5.24	444.421		5.24	160.686		22.81	15.5463		40.89	5.99341e-06
5.25	448.069		5.25	161.195		22.85	1.55158e-05		41	2.23752e-05
5.26	448.261		5.26	157.107		22.87	6.81542e-05		41.05	9.39854e-05
5.27	452.262		5.27	160.684		22.9	15.5462		41.17	6.74621e-05
5.28	452.838		5.28	163.304		22.92	0.00364966		41.2	0.00013502
5.29	451.707		5.29	166.477		22.94	0.000158572		41.23	6.46571e-06
5.3	450.718		5.3	166.968		23	0.000138909		41.29	6.6849e-05
5.31	461.51		5.31	164.821		23.04	15.5047		41.34	1.07185e-06
5.32	459.027		5.32	158.677		23.09	0.0008537		41.36	3.29587e-05
5.33	463.897		5.33	161.297		23.11	0.000371021		41.4	1.37166e-05
5.34	468.412		5.34	160.065		23.16	15.4998		41.59	0.000122762
5.35	471.254		5.35	159.523		23.18	0.00129264		41.65	0.000228036
5.36	471.706		5.36	162.572		23.2	0.000917748		41.69	0.000148852
5.37	466.861		5.37	161.62		23.24	0.000128518		41.77	0.000139871
5.38	458.676		5.38	163.226		23.27	15.4974		41.8	5.95656e-05
5.39	461.891		5.39	161.539		23.34	0.000109425		41.89	5.33898e-06
5.4	465.713		5.4	159.589		23.47	1.75387e-05		42.06	3.08083e-05
5.41	470.421		5.41	162.854		23.55	0.000498027		42.15	0.00437832
5.42	477.926		5.42	161.628		23.58	0.000359812		42.24	1.65761e-05
5.43	489.201		5.43	158.829		23.6	0.0002922		42.44	0.000109423
5.44	492.473		5.44	164.449		23.63	1.35234e-05		42.63	0.000343406
5.45	495.585		5.45	161.529		23.68	9.64838e-05		42.69	1.06289e-05
5.46	507.93		5.46	163.135		23.72	15.4963		42.81	0.00029207
5.47	506.976		5.47	161.318		23.75	7.70106e-05		42.85	0.000242865
5.48	509.163		5.48	163.503		23.78	0.000296023		42.97	0.000859249
5.49	509.582		5.49	166.021		23.81	15.4889		43.07	8.78722e-06
5.5	505.312		5.5	165.144		23.84	15.4886		43.16	6.20711e-05
5.51	508.338		5.51	166.191		23.88	0.0236638		43.21	8.90143e-05
5.52	518.596		5.52	166.838		23.92	0.0111132		43.38	7.96831e-05
5.53	526.615		5.53	165.23		23.96	0.000258367		43.48	4.47744e-05
5.54	526.027		5.54	163.259		24	0.000175597		43.58	0.000256751
5.55	525.138		5.55	162.643		24.06	0.00817383		43.81	0.00015751
5.56	525.213		5.56	164.4		24.11	0.00218091		43.91	4.15976e-05
5.57	530.466		5.57	165.015		24.15	3.88839e-05		43.95	3.35907e-05
5.58	525.302		5.58	163.418		24.19	0.00391929		44.09	0.002478
5.59	530.96		5.59	162.946		24.23	0.00315033		44.12	0.000478625
5.6	530.615		5.6	162.95		24.31	0.00274517		44.18	4.36133e-06
5.61	536.235		5.61	168.994		24.38	0.00145069		44.25	4.08902e-05
5.62	537.12		5.62	167.595		24.4	0.00130981		44.31	0.000272042
5.63	532.61		5.63	162.767		24.42	0.000416438		44.35	8.26577e-05
5.64	531.572		5.64	163.471		24.45	0.000390566		44.42	6.62656e-05
5.65	533.79		5.65	167.403		24.48	0.00101209		44.47	7.30357e-05
5.66	547.752		5.66	165.97		24.51	0.000145338		44.71	6.13753e-05
5.67	543.105		5.67	163.97		24.53	6.26972e-05		44.77	0.00285305
5.68	552.524		5.68	165.835		24.56	0.00058861		45.06	0.000101828
5.69	545.257		5.69	169.2		24.59	0.000235407		45.25	0.00012412
5.7	549.603		5.7	164.088		24.62	0.000226912		45.33	2.26144e-05
5.71	559.093		5.71	161.522		24.66	2.77047e-05		45.43	0.000694631
5.72	554.446		5.72	162.037		24.71	0.000125679		45.54	4.34517e-06
5.73	556.67		5.73	159.211		24.73	1.3279e-05		45.56	6.49102e-05
5.74	560.387		5.74	166.471		24.78	0.000146873		45.65	0.000238189
5.75	556.993		5.75	160.634		24.82	0.0001462		45.76	0.000864983
5.76	548.939		5.76	163.109		24.86	0.000232521		45.81	7.38554e-06
5.77	558.914		5.77	162.71		24.9	9.01395e-05		45.88	1.00702e-05
5.78	560.009		5.78	168.346		24.94	7.59879e-05		46.02	0.000178423
5.79	565.481		5.79	162.308		24.98	1.61566e-05		46.14	0.000133202
5.8	563.469		5.8	163.734		25.05	0.000274972		46.18	0.000135521
5.81	563.804		5.81	162.689		25.1	9.14385e-05		46.22	5.81151e-07
5.82	560.206		5.82	167.12		25.15	0.000162883		46.33	4.61122e-05
5.83	559.404		5.83	167.843		25.18	0.000275577		46.46	1.57414e-05
5.84	566.815		5.84	165.438		25.2	0.00016732		46.58	0.000330359
5.85	566.631		5.85	166.364		25.24	0.000142885		46.7	5.74172e-05
5.86	569.156		5.86	168.212		25.27	0.00505444		46.77	0.000218338
5.87	575.121		5.87	172.228		25.32	0.00464356		46.8	0.000137859
5.88	569.945		5.88	166.365		25.39	0.00330771		46.87	0.00204516
5.89	574.682		5.89	168.763		25.45	0.00298951		46.92	9.71986e-05
5.9	577.962		5.9	172.685		25.5	0.001904		46.94	8.09127e-05
5.91	574.483		5.91	172.687		25.52	0.000885333		47	4.53028e-05
5.92	571.587		5.92	167.787		25.57	4.66945e-05		47.16	0.00011724
5.93	571.691		5.93	167.451		25.6	0.000958954		47.18	0.000200637
5.94	579.549		5.94	173.489		25.62	0.000919503		47.23	1.62146e-05
5.95	588.316		5.95	173.773		25.66	2.41062e-05		47.33	2.0723e-05
5.96	586.225		5.96	166.196		25.68	0.000492739		47.41	0.000268319
5.97	591.061		5.97	164.461		25.74	0.000375838		47.7	0.000391026
5.98	582.928		5.98	169.164		25.77	0.000282239		47.75	0.000181381
5.99	586.596		5.99	167.577		25.8	0.000141617		47.9	0.0027768
6	589.246		6	166.227		25.84	2.26041e-05		47.92	0.00276271
6.01	585.619		6.01	166.204		25.91	0.000351548		47.97	0.00254205
6.02	593.914		6.02	172.48		25.96	0.000152055		48.06	0.0023588
6.03	596.144		6.03	173.884		25.98	0.000138703		48.08	0.000520024
6.04	597.781		6.04	170.07		26.01	1.16441e-05		48.22	0.000376148
6.05	603.854		6.05	171.627		26.06	4.93423e-05		48.36	0.00293795
6.06	592.229		6.06	173.341		26.14	5.90444e-05		48.49	0.000658188
6.07	597.967		6.07	175.084		26.23	0.000152531		48.57	1.98394e-05
6.08	606.219		6.08	170.666		26.3	4.98325e-05		48.6	9.96135e-05
6.09	603.025		6.09	167.888		26.4	0.000995217		48.8	1.59318e-05
6.1	607.874		6.1	167.322		26.44	0.00051654		48.95	0.000160883
6.11	608.695		6.11	175.202		26.47	9.59099e-05		49.04	0.000191844
6.12	615.379		6.12	170.047		26.5	7.8432e-05		49.07	2.55107e-05
6.13	620.804		6.13	171.747		26.58	9.9091e-06		49.25	0.000371117
6.14	635.548		6.14	174.643		26.63	8.33419e-05		49.32	6.51474e-05
6.15	620.917		6.15	173.727		26.65	3.0961e-05		49.36	5.26739e-06
6.16	642.265		6.16	173.387		26.67	5.1781e-05		49.57	7.25846e-05
6.17	644.393		6.17	172.485		26.71	15.4551		49.66	2.52372e-05
6.18	645.259		6.18	170.187		26.77	15.452		49.78	3.8266e-05
6.19	640.684		6.19	175.705		26.8	15.4473		49.86	0.000411072
6.2	635.903		6.2	177.818		26.83	15.4472		49.97	7.61011e-05
6.21	653.738		6.21	176.67		26.85	0.000487176		50.01	0.000122924
6.22	654.694		6.22	170.775		26.87	15.4462		50.14	0.000459497
6.23	649.598		6.23	173.437		26.9	15.4456		50.31	0.00292587
6.24	645.462		6.24	175.194		26.93	15.4454		50.38	0.000152847
6.25	643.35		6.25	181.203		27.01	8.74017		50.47	0.000583074
6.26	642.244		6.26	178.837		27.08	8.74008		50.51	0.000119274
6.27	640.905		6.27	183.409		27.13	5.0368e-05		50.73	0.000729071
6.28	644.364		6.28	181.262		27.15	0.0174784		50.85	0.000138674
6.29	651.09		6.29	179.439		27.19	0.000254311		50.92	5.49719e-05
6.3	660.903		6.3	174.617		27.23	0.0169361		51.07	0.000172293
6.31	676.126		6.31	169.996		27.28	0.000140333		51.13	0.00422355
6.32	680.257		6.32	179.967		27.3	5.44979e-05		51.16	0.000697271
6.33	682.287		6.33	174.315		27.33	0.000540972		51.2	0.000219179
6.34	678.764		6.34	173.576		27.4	0.000504732		51.4	0.000460579
6.35	682.481		6.35	177.865		27.46	0.000203572		51.51	0.00278802
6.36	683.261		6.36	178.776		27.48	3.51509e-05		51.66	0.00245533
6.37	683.588		6.37	177.369		27.54	0.0160559		51.75	0.000161375
6.38	682.427		6.38	169.623		27.56	0.00807001		51.78	0.000149005
6.39	681.444		6.39	176.374		27.59	4.00816e-05		51.81	0.000146809
6.4	681.062		6.4	182.745		27.63	8.00671e-05		51.9	7.13908e-05
6.41	680.946		6.41	183.266		27.66	7.68202		51.98	0.00064266
6.42	676.784		6.42	182.221		27.75	7.68201		52.1	3.57114e-05
6.43	685.393		6.43	183.839		27.79	7.68177		52.48	5.70528e-05
6.44	688.123		6.44	180.18		27.84	7.68047		52.54	4.36652e-05
6.45	704.196		6.45	183.125		27.88	0.0329037		52.77	1.31673e-05
6.46	710.622		6.46	176.739		27.9	0.0307828		52.82	0.000202889
6.47	710.59		6.47	176.995		27.92	0.0303768		53.01	0.000295427
6.48	706.988		6.48	186.097		27.97	0.0198487		53.1	1.51919e-05
6.49	699.465		6.49	181.894		28.03	0.0197197		53.19	0.00122833
6.5	699.244		6.5	182.994		28.08	0.00169857		53.27	0.00010782
6.51	701.415		6.51	189.879		28.1	0.00125931		53.4	0.00356069
6.52	704.415		6.52	186.712		28.15	0.00093957		53.42	8.91233e-06
6.53	705.864		6.53	185.171		28.18	0.00046076		53.47	0.000100098
6.54	713.001		6.54	177.806		28.21	2.15198e-05		53.58	4.75847e-05
6.55	710.548		6.55	182.92		28.27	0.000178483		53.67	2.72182e-05
6.56	714.555		6.56	188.089		28.3	0.0155578		53.79	0.000495402
6.57	710.153		6.57	188.96		28.34	0.00782671		53.88	0.000361428
6.58	708.261		6.58	189.075		28.36	7.31479e-05		54.02	0.0010636
6.59	707.222		6.59	186.033		28.41	0.00185712		54.1	5.66926e-05
6.6	706.623		6.6	186.789		28.44	0.00080002		54.21	0.000700924
6.61	718.134		6.61	189.376		28.47	0.000379507		54.26	4.75241e-06
6.62	733.272		6.62	184.245		28.51	0.000186965		54.34	0.000316067
6.63	728.306		6.63	184.636		28.56	0.000180713		54.36	0.00113581
6.64	726.941		6.64	189.212		28.62	0.00309813		54.38	0.000398936
6.65	719.399		6.65	206.086		28.64	0.000841843		54.47	0.000469661
6.66	712.677		6.66	199.17		28.66	0.000434483		54.52	0.000176052
6.67	721.715		6.67	183.943		28.69	8.90923e-05		54.58	9.45634e-05
6.68	737.639		6.68	186.216		28.72	0.00198028		54.6	4.15098e-05
6.69	748.697		6.69	188.715		28.77	0.00182835		54.72	8.71819e-05
6.7	741.766		6.7	193.714		28.82	8.66163e-05		54.83	0.000137097
6.71	751.689		6.71	187.524		28.84	0.000160628		54.89	9.01847e-05
6.72	756.9		6.72	196.677		28.87	0.000147961		55.06	0.000374619
6.73	758.887		6.73	191.863		28.89	0.00152265		55.09	0.00021048
6.74	758.675		6.74	203.851		28.94	0.000150268		55.27	0.000142248
6.75	749.802		6.75	188.235		28.96	0.00136136		55.35	0.00121275
6.76	754.382		6.76	192.183		28.99	0.000295072		55.43	0.000133964
6.77	763.674		6.77	192.44		29.03	1.71267e-05		55.59	0.000342528
6.78	770.557		6.78	194.329		29.11	0.000803948		55.64	2.41729e-05
6.79	775.7		6.79	196.6		29.16	0.000622826		55.77	3.43446e-05
6.8	776.951		6.8	187.125		29.2	0.000464343		55.85	0.000355524
6.81	779.975		6.81	193.615		29.23	4.68379e-05		55.94	5.70912e-05
6.82	773.681		6.82	192.181		29.28	0.000290016		55.99	0.00043085
6.83	771.745		6.83	184.041		29.32	0.000132425		56.02	0.000210582
6.84	769.193		6.84	189.568		29.35	6.18884e-05		56.18	0.00036889
6.85	769.013		6.85	195.588		29.37	0.00556742		56.32	0.014218
6.86	764.267		6.86	193.916		29.39	0.000398416		56.48	0.000560229
6.87	771.466		6.87	199.419		29.44	0.000243367		56.5	0.0004542
6.88	775.863		6.88	201.793		29.46	0.00450208		56.57	0.00530897
6.89	789.164		6.89	208.03		29.5	0.00220975		56.62	0.00135826
6.9	796.798		6.9	203.717		29.52	2.5444e-05		56.74	0.000262614
6.91	789.51		6.91	209.437		29.55	0.000380818		56.81	0.000276865
6.92	790.713		6.92	195.222		29.57	0.000273176		56.93	0.000240629
6.93	786.257		6.93	203.314		29.6	5.69063e-06		57.01	4.43733e-05
6.94	786.563		6.94	204.547		29.64	0.00105838		57.04	0.000172552
6.95	788.646		6.95	206.133		29.66	0.000472275		57.14	8.48799e-05
6.96	788.773		6.96	208.864		29.69	0.000142341		57.22	0.00141878
6.97	787.647		6.97	206.918		29.72	3.50925e-05		57.29	0.000262177
6.98	795.88		6.98	211.82		29.74	0.000207794		57.39	0.00017253
6.99	803.773		6.99	212.327		29.78	0.000111627		57.44	0.000158053
7	800.585		7	210.934		29.82	0.000570426		57.49	7.11817e-05
7.01	796.838		7.01	213.621		29.86	2.99883e-05		57.56	0.000923904
7.02	799.549		7.02	220.149		29.89	0.000155137		57.65	5.80635e-05
7.03	792.752		7.03	214.047		29.92	2.92431e-05		57.88	3.37626e-05
7.04	808.661		7.04	213.139		29.96	7.64468		57.91	0.00018094
7.05	812.077		7.05	214.493		29.98	9.45001e-05		58.08	8.39804e-05
7.06	815.747		7.06	217.436		30.02	0.00273921		58.2	0.000649438
7.07	809.849		7.07	215.015		30.04	0.00143703		58.32	0.000429076
7.08	812.675		7.08	210.904		30.07	0.00011823		58.43	0.00021755
7.09	816.674		7.09	217.762		30.09	7.64152		58.55	0.00117635
7.1	811.201		7.1	223.895		30.11	0.0161406		58.62	0.000242426
7.11	815.86		7.11	220.035		30.13	0.00818307		58.73	0.00159338
7.12	814.331		7.12	212.705		30.15	7.6252		58.77	0.000378306
7.13	816.701		7.13	208.833		30.19	0.00297298		58.89	0.000273805
7.14	815.409		7.14	218.401		30.21	0.00151056		58.92	7.99828e-05
7.15	815.361		7.15	218.201		30.23	7.62209		58.99	2.65008e-05
7.16	814.136		7.16	218.008		30.29	0.000107731		59.11	0.00194142
7.17	815.575		7.17	218.235		30.32	1.88187e-05		59.28	0.000359466
7.18	814.952		7.18	218.679		30.38	3.39116e-05		59.47	0.000188759
7.19	818.468		7.19	219.664		30.42	4.26093e-05		59.56	0.000661083
7.2	828.131		7.2	218.947		30.44	8.97451e-05		59.6	0.000925809
7.21	833.672		7.21	222.308		30.55	6.20733e-05		59.71	0.00264453
7.22	831.498		7.22	224.738		30.6	7.61715		59.73	0.00228317
7.23	833.603		7.23	221.273		30.63	7.6153		59.9	0.00177236
7.24	834.068		7.24	221.937		30.66	0.0106887		60	0.000115062
7.25	838.011		7.25	218.168		30.69	6.68782e-06		60.11	0.00138795
7.26	847.951		7.26	223.741		30.72	2.30511e-05		60.18	0.000301514
7.27	851.472		7.27	221.471		30.74	0.00925125		60.24	0.000867474
7.28	852.705		7.28	216.335		30.78	0.000936244		60.26	0.000324599
7.29	850.106		7.29	220.375		30.82	0.000571776		60.28	0.000181547
7.3	848.39		7.3	222.452		30.89	0.00688134		60.35	0.00568143
7.31	859.754		7.31	227.09		30.93	0.00682761		60.57	0.000451111
7.32	871.183		7.32	225.865		30.95	0.00130964		60.59	0.00017647
7.33	890.61		7.33	224.279		30.97	0.000342364		60.8	5.38395e-05
7.34	881.075		7.34	225.38		31.01	0.000685439		60.89	0.000251801
7.35	885.682		7.35	225.537		31.03	0.00010663		61.04	0.000133067
7.36	867.616		7.36	229.733		31.06	0.00418327		61.09	0.000444901
7.37	862.918		7.37	224.422		31.08	0.00117709		61.12	0.000329797
7.38	878.839		7.38	227.344		31.1	0.000720535		61.18	2.81279e-05
7.39	895.439		7.39	227.949		31.13	7.77465e-05		61.24	0.000281981
7.4	889.179		7.4	231.018		31.18	0.00181645		61.27	6.04815e-05
7.41	893.224		7.41	229.916		31.2	0.00178571		61.38	2.87315e-05
7.42	898.51		7.42	227.433		31.22	0.00166891		61.43	3.46979e-05
7.43	902.791		7.43	228.185		31.27	0.000251369		61.47	0.000171405
7.44	912.824		7.44	236.301		31.33	0.00123078		61.57	1.01959e-05
7.45	905.544		7.45	231.823		31.36	0.000596603		61.59	0.000160567
7.46	908.697		7.46	234.201		31.39	0.000162028		61.74	0.000624786
7.47	919.142		7.47	231.676		31.42	0.000550306		61.93	7.86671e-05
7.48	926.016		7.48	235.944		31.46	0.000363349		62.04	0.000163194
7.49	923.466		7.49	234.858		31.49	0.000108989		62.17	8.61329e-05
7.5	914.003		7.5	225.84		31.57	0.000127108		62.47	0.000219484
7.51	920.481		7.51	231.148		31.61	6.54231e-05		62.62	0.00121822
7.52	929.76		7.52	234.708		31.63	0.00100731		62.65	0.00040425
7.53	926.881		7.53	230.725		31.67	0.00051444		62.84	0.000151308
7.54	931.086		7.54	226.557		31.7	1.91199e-05		62.9	0.00010374
7.55	931.834		7.55	237.943		31.72	7.60394		63	0.000326923
7.56	937.589		7.56	235.911		31.76	0.000389253		63.02	0.00018878
7.57	943.047		7.57	233.252		31.8	7.60316		63.13	0.000596478
7.58	937.04		7.58	236.107		31.86	0.000229143		63.15	0.000317258
7.59	934.503		7.59	233.691		31.89	0.000114176		63.37	0.00104239
7.6	930.669		7.6	236.058		31.92	7.35274		63.41	5.33556e-06
7.61	927.67		7.61	236.187		31.97	0.931711		63.53	0.000425917
7.62	930.423		7.62	234.842		32.04	0.000554608		63.6	0.000132599
7.63	936.36		7.63	239.706		32.06	0.000514106		63.67	0.000182197
7.64	939.832		7.64	236.028		32.12	0.000355831		63.88	0.000448522
7.65	942.335		7.65	237.078		32.17	0.00028156		63.93	0.000118528
7.66	935.03		7.66	238.806		32.23	0.00163556		63.96	1.76276e-05
7.67	941.24		7.67	238.572		32.25	0.000850662		64.06	0.000218433
7.68	949.774		7.68	238.409		32.27	0.000275287		64.12	0.00516805
7.69	956.911		7.69	237.384		32.31	0.000566713		64.37	0.00089454
7.7	961.088		7.7	239.612		32.38	0.000290096		64.65	8.29979e-05
7.71	952.014		7.71	233.544		32.42	0.925585		65	0.000261176
7.72	957.636		7.72	239.401		32.52	0.924398		65.23	0.000977055
7.73	951.645		7.73	241.154		32.57	0.000231361		65.42	0.00160801
7.74	951.196		7.74	239.514		32.59	0.9239		65.57	0.000449173
7.75	953.95		7.75	236.229		32.65	0.00184633		65.69	6.58754e-05
7.76	957.431		7.76	247.166		32.71	0.000179731		65.86	0.000409348
7.77	971.88		7.77	241.228		32.74	0.0014937		65.99	0.000249136
7.78	978.686		7.78	240.207		32.77	0.000639791		66.11	2.99749e-05
7.79	967.2		7.79	241.671		32.79	8.06938e-05		66.24	0.000307546
7.8	973.76		7.8	242.958		32.82	0.00028192		66.26	0.000262894
7.81	982.208		7.81	244.914		32.85	0.000213904		66.33	0.00222061
7.82	985.673		7.82	242.005		32.88	7.23943e-05		66.39	7.96661e-05
7.83	977.453		7.83	243.168		32.9	0.000583639		66.48	0.00214304
7.84	968.923		7.84	246.66		32.93	0.000511298		66.6	0.00433414
7.85	967.388		7.85	247.206		32.98	0.000219715		66.71	0.000110573
7.86	970.957		7.86	253.379		33.02	6.41402e-05		66.82	0.000149129
7.87	977.42		7.87	239.775		33.09	0.920717		66.93	0.000326113
7.88	980.663		7.88	243.866		33.16	0.00159627		66.98	2.05271e-05
7.89	977.571		7.89	245.491		33.2	0.00156424		67.02	0.00026084
7.9	988.849		7.9	249.838		33.22	0.000924381		67.15	0.00028485
7.91	1002.59		7.91	247.847		33.26	4.81535e-05		67.23	0.000176632
7.92	1004.8		7.92	250.887		33.29	3.23245e-05		67.38	0.0026564
7.93	996.036		7.93	254.299		33.32	7.10552e-05		67.44	0.000850771
7.94	1005.22		7.94	256.083		33.35	0.000146177		67.54	8.64263e-05
7.95	1016.92		7.95	245.675		33.42	0.000124072		67.61	0.00013112
7.96	1024.02		7.96	251.274		33.44	0.919001		67.67	0.000188346
7.97	1024.87		7.97	253.319		33.48	0.000120982		67.75	0.0043862
7.98	1026.42		7.98	250.655		33.51	3.3102e-05		67.91	2.84125e-05
7.99	1041.18		7.99	254.962		33.54	0.918768		68.05	0.0613629
8	1050.88		8	259.945		33.56	0.917963		68.15	0.00010577
8.01	1044.76		8.01	256.981		33.58	0.886727		68.23	1.74582e-06
8.02	1043.01		8.02	262.126		33.61	0.882599		68.43	6.57439e-05
8.03	1042.96		8.03	253.327		33.64	0.011925		68.55	4.45187e-05
8.04	1049.03		8.04	247.125		33.67	0.00579909		68.67	0.0013108
8.05	1046.82		8.05	251.331		33.69	0.000763999		68.73	0.000262073
8.06	1045.4		8.06	251.431		33.72	0.000303456		69.02	3.94508e-05
8.07	1044.57		8.07	249.853		33.77	0.868935		69.14	0.00106907
8.08	1041.72		8.08	250.576		33.81	0.487117		69.22	0.000101966
8.09	1039.14		8.09	254.141		33.86	0.000113733		69.4	0.0574277
8.1	1049.06		8.1	251.085		33.89	0.486952		69.52	0.000103225
8.11	1046.93		8.11	253.158		33.95	0.486873		69.6	0.000211515
8.12	1048.2		8.12	256.477		34.02	0.000171467		69.64	0.000153972
8.13	1051.37		8.13	256.762		34.05	0.486659		69.71	0.000149943
8.14	1056.24		8.14	261.156		34.08	0.00358171		69.89	0.000742871
8.15	1065.11		8.15	263.974		34.11	0.478689		69.95	1.23293e-05
8.16	1063.72		8.16	258.556		34.13	0.478156		70.03	0.00155491
8.17	1069.22		8.17	258.032		34.16	0.478013		70.05	2.72204e-05
8.18	1060.75		8.18	264.263		34.19	0.0114935		70.14	0.000142862
8.19	1064.79		8.19	257.388		34.25	0.000324985		70.27	0.000362945
8.2	1055.78		8.2	261.735		34.27	0.00331945		70.33	0.000166067
8.21	1066.42		8.21	265.071		34.29	0.000628389		70.43	0.00491739
8.22	1068.95		8.22	264.221		34.35	0.00194639		70.62	0.000679306
8.23	1070.24		8.23	269.169		34.44	6.51319e-05		70.66	0.000116752
8.24	1074.46		8.24	263.346		34.47	0.000284937		70.73	7.73805e-05
8.25	1076.51		8.25	260.817		34.5	0.00158896		70.94	0.00369983
8.26	1075.39		8.26	264.189		34.59	0.0012055		70.97	0.000272244
8.27	1071.03		8.27	262.447		34.64	3.22708e-05		71.18	2.99958e-05
8.28	1069.63		8.28	260.683		34.66	0.000813462		71.5	0.00083101
8.29	1072.08		8.29	263.739		34.68	0.000238482		71.53	0.000552516
8.3	1071.34		8.3	270.526		34.7	0.000439298		71.63	0.000432185
8.31	1076.6		8.31	262.8		34.75	1.47803e-05		71.71	0.00162827
8.32	1089.08		8.32	268.182		34.77	0.451193		71.84	0.00139274
8.33	1077.81		8.33	265.29		34.82	8.45589e-05		71.91	0.00107922
8.34	1078.98		8.34	268.078		34.86	0.00017258		71.99	0.000340399
8.35	1083.83		8.35	273.179		34.89	2.32382e-05		72.1	1.70315e-05
8.36	1090.29		8.36	269.121		34.92	8.79679e-05		72.28	0.000181582
8.37	1094.83		8.37	263.152		34.95	0.450427		72.5	0.00133999
8.38	1107.9		8.38	265.046		35.01	0.44841		72.6	0.0280964
8.39	1104.46		8.39	268.687		35.07	0.000188292		72.69	0.0196635
8.4	1107.47		8.4	263.077		35.12	0.000115552		72.8	0.00791829
8.41	1105.94		8.41	263.486		35.14	4.50585e-05		72.96	5.34501e-05
8.42	1108.05		8.42	271.684		35.17	6.90763e-05		73.04	7.28036e-05
8.43	1108.8		8.43	267.587		35.19	5.13739e-05		73.17	0.000290411
8.44	1112.23		8.44	271.523		35.22	6.55225e-06		73.23	0.000139261
8.45	1113.08		8.45	268.927		35.25	0.448198		73.37	0.000158865
8.46	1113.17		8.46	266.301		35.27	0.000351894		73.47	0.00018835
8.47	1125.23		8.47	268.473		35.31	2.13485e-05		73.64	0.000102161
8.48	1148.42		8.48	265.089		35.36	3.01799e-05		73.82	0.000155472
8.49	1143.49		8.49	267.392		35.38	0.447612		73.95	2.70145e-07
8.5	1144.96		8.5	272.15		35.42	0.000181331		74.2	0.000301845
8.51	1147.64		8.51	271.507		35.45	0.000106167		74.28	0.000386448
8.52	1154.81		8.52	275.278		35.47	3.1551e-05		74.33	2.57225e-06
8.53	1158.03		8.53	278.481		35.5	0.00011846		74.61	0.000608129
8.54	1154.19		8.54	272.181		35.52	0.000208836		74.63	1.1712e-06
8.55	1154.86		8.55	274.819		35.56	0.000144776		74.66	1.1058e-05
8.56	1168.75		8.56	272.471		35.6	1.99958e-05		74.73	0.000609794
8.57	1167.24		8.57	270.381		35.63	1.49839e-05		74.78	0.000520293
8.58	1162.39		8.58	275.585		35.67	0.447095		74.96	8.87202e-05
8.59	1167.51		8.59	281.027		35.78	3.60274e-05		74.99	1.48813e-07
8.6	1172.62		8.6	282.78		35.84	2.92115e-05		75.08	0.000213803
8.61	1169.2		8.61	277.782		35.89	0.446811		75.1	3.10139e-05
8.62	1171.93		8.62	272.927		35.94	0.000178304		75.23	1.9676e-05
8.63	1174.92		8.63	278.353		35.96	0.000159109		75.34	0.00123276
8.64	1183.25		8.64	280.373		35.99	0.000575411		75.4	0.00141542
8.65	1184.29		8.65	280.254		36.04	9.32555e-05		75.46	0.000892379
8.66	1185.18		8.66	282.16		36.12	0.00011749		75.56	0.000248499
8.67	1188.58		8.67	279.879		36.2	0.000216027		75.6	1.0796e-05
8.68	1196.92		8.68	281.637		36.25	5.64819e-05		75.73	0.00019355
8.69	1200.93		8.69	278.9		36.29	0.000105051		75.78	0.0564156
8.7	1195.16		8.7	275.649		36.32	6.55731e-05		75.89	1.10778e-05
8.71	1196.01		8.71	278.947		36.38	0.000108951		75.92	1.21884e-05
8.72	1191.39		8.72	275.285		36.4	7.59625e-05		76.08	1.23271e-05
8.73	1198.91		8.73	280.399		36.45	0.000133219		76.24	8.57372e-05
8.74	1201.09		8.74	272.646		36.49	0.44576		76.3	0.00054472
8.75	1201		8.75	275.876		36.52	3.55242e-05		76.68	0.00015505
8.76	1191.85		8.76	286.741		36.56	0.445719		76.81	2.50329e-05
8.77	1190.03		8.77	275.92		36.64	1.64824e-05		76.95	0.000220577
8.78	1192.94		8.78	277.173		36.68	5.8943e-05		76.98	4.65163e-05
8.79	1199.12		8.79	280.199		36.7	0.445164		77.15	4.95399e-05
8.8	1207.99		8.8	284.972		36.74	5.96851e-05		77.27	0.00160956
8.81	1207.92		8.81	284.365		36.77	0.000105983		77.38	0.00181576
8.82	1215.17		8.82	284.835		36.82	0.444778		77.51	4.66409e-05
8.83	1213.9		8.83	287.77		36.87	0.00019969		77.69	0.000213475
8.84	1213.27		8.84	290.8		36.91	8.15368e-05		77.78	1.79389e-06
8.85	1209.53		8.85	288.53		36.93	4.96672e-05		77.85	6.4912e-05
8.86	1210.25		8.86	294.072		36.95	0.000111382		77.95	3.92967e-05
8.87	1221		8.87	289.825		37	3.71901e-05		78.31	9.34839e-05
8.88	1238.12		8.88	292.719		37.04	0.444532		78.38	0.000510701
8.89	1237.32		8.89	292.505		37.11	0.44289		78.46	0.000167617
8.9	1238.8		8.9	292.176		37.17	0.44273		78.55	3.60532e-05
8.91	1246.2		8.91	291.067		37.19	0.44267		78.63	0.000369223
8.92	1242.85		8.92	288.988		37.22	0.112761		78.74	0.000220178
8.93	1234.56		8.93	291.983		37.25	0.112399		78.9	8.86187e-05
8.94	1237.1		8.94	296.08		37.27	0.112266		79.04	0.000224666
8.95	1248.13		8.95	292.229		37.29	0.0562137		79.11	0.000561306
8.96	1251.23		8.96	299.988		37.32	8.55986e-05		79.23	0.0010962
8.97	1251.98		8.97	297.425		37.36	7.86488e-05		79.41	0.000377458
8.98	1275.5		8.98	301.848		37.38	0.000195261		79.54	0.000913399
8.99	1273.93		8.99	298.227		37.42	0.000124887		79.61	6.90018e-05
9	1268.68		9	297.49		37.46	6.30393e-05		79.76	0.000800063
9.01	1282.71		9.01	293.153		37.5	1.57885e-05		79.81	0.000366197
9.02	1289.96		9.02	299.105		37.54	0.329795		79.87	0.000193657
9.03	1290.3		9.03	294.372		37.58	0.000129948		79.92	8.68619e-05
9.04	1291.77		9.04	294.964		37.63	0.329481		79.94	0.0380873
9.05	1288.77		9.05	297.615		37.66	0.328818		80.05	2.3203e-05
9.06	1293.46		9.06	300.487		37.7	5.80483e-05		80.12	0.00011851
9.07	1293.54		9.07	296.222		37.74	0.327985		80.3	4.32042e-05
9.08	1298.76		9.08	297.655		37.77	0.000499591		80.64	6.42174e-05
9.09	1298.3		9.09	302.501		37.79	0.000211383		80.76	6.43528e-05
9.1	1310.75		9.1	301.075		37.83	0.326967		80.89	3.63229e-05
9.11	1303.3		9.11	298.062		37.89	0.000530593		81	3.18037e-05
9.12	1307.47		9.12	302.31		37.93	0.00025318		81.03	7.84196e-05
9.13	1306.28		9.13	309.255		37.95	0.292114		81.15	0.000711757
9.14	1311.92		9.14	305.923		37.98	0.0547121		81.17	0.00057826
9.15	1316.39		9.15	308.39		38.01	0.182421		81.23	0.000758699
9.16	1318.72		9.16	310.497		38.04	0.182272		81.44	0.0161699
9.17	1330.05		9.17	318.292		38.08	0.182179		81.63	0.000105459
9.18	1341.68		9.18	314.887		38.11	0.180503		81.7	6.06963e-05
9.19	1343.88		9.19	305.685		38.15	0.180193		81.85	0.00026028
9.2	1340.47		9.2	307.382		38.19	0.000153285		82.18	0.000102207
9.21	1338.09		9.21	311.329		38.21	0.179894		82.25	0.000180549
9.22	1335.85		9.22	307.131		38.23	0.00325554		82.3	2.01525e-05
9.23	1330.2		9.23	303.902		38.26	0.00165256		82.34	9.58866e-05
9.24	1326.26		9.24	306.607		38.3	0.176575		82.43	0.000155722
9.25	1323.58		9.25	312.186		38.34	0.000167215		82.66	0.000252402
9.26	1330.84		9.26	305.362		38.36	0.176299		82.74	0.000119063
9.27	1333.05		9.27	308.364		38.38	0.00030453		82.85	1.09647e-05
9.28	1336		9.28	312.451		38.4	0.175046		83.28	0.000197937
9.29	1334.16		9.29	313.439		38.42	0.174652		83.37	0.00028293
9.3	1348.33		9.3	315.705		38.46	0.000239653		83.39	0.00010343
9.31	1356.16		9.31	324.904		38.5	0.00020622		83.47	8.71515e-06
9.32	1350.94		9.32	311.828		38.53	0.173994		83.58	0.000127128
9.33	1357.34		9.33	323.805		38.57	0.173215		83.6	5.09272e-06
9.34	1363.79		9.34	329.058		38.62	0.172529		83.62	9.34093e-05
9.35	1371		9.35	339.832		38.66	3.36441e-05		83.67	0.00014365
9.36	1368.81		9.36	321.145		38.68	0.000453264		83.81	0.000182023
9.37	1370.72		9.37	327.938		38.71	0.000222768		83.87	3.12574e-05
9.38	1394.34		9.38	317.901		38.74	1.5262e-05		83.89	0.000205921
9.39	1400.07		9.39	330.527		38.8	0.00124063		84.04	0.000303669
9.4	1392.51		9.4	312.684		38.83	0.00122617		84.07	0.000198711
9.41	1378.05		9.41	319.735		38.85	0.000132985		84.13	9.13548e-05
9.42	1388.7		9.42	324.721		38.9	0.000941315		84.16	3.63365e-05
9.43	1409.48		9.43	343.748		38.92	0.000499373		84.21	0.000246709
9.44	1412.25		9.44	328.825		38.95	0.000477297		84.28	0.000841996
9.45	1411.67		9.45	333.794		38.97	4.30243e-05		84.34	0.000190214
9.46	1410.1		9.46	343.465		39.01	0.17075		84.5	8.5977e-05
9.47	1407.51		9.47	341.246		39.05	0.00437003		84.76	0.000874615
9.48	1412.27		9.48	323.422		39.07	0.00220612		84.82	0.000230836
9.49	1419.84		9.49	333.844		39.09	0.00181183		84.95	0.000269956
9.5	1417.69		9.5	345.682		39.12	6.52857e-05		84.98	0.000271133
9.51	1421.57		9.51	345.945		39.14	0.00132399		85.12	0.000370099
9.52	1429.68		9.52	334.611		39.18	0.000643679		85.46	0.00142583
9.53	1436.27		9.53	345.636		39.23	0.00210655		85.49	5.12042e-05
9.54	1439.22		9.54	347.114		39.26	0.000733693		85.62	0.000146598
9.55	1441.61		9.55	349.283		39.32	2.40598e-06		85.7	0.000236386
9.56	1437.06		9.56	346.844		39.35	0.000648424		85.81	9.50354e-05
9.57	1434.35		9.57	345.473		39.42	0.000271044		86	0.00826078
9.58	1438.12		9.58	336.695		39.45	2.00816e-05		86.15	0.000175655
9.59	1442.18		9.59	331.257		39.49	9.72674e-06		86.29	0.000198454
9.6	1455.53		9.6	345.268		39.51	0.000218644		86.51	0.0029776
9.61	1439.51		9.61	333.371		39.53	0.000121917		86.65	0.00131665
9.62	1439.41		9.62	341.023		39.58	6.7253e-05		86.81	0.000133868
9.63	1434.59		9.63	352.057		39.63	0.000372042		86.85	0.000641914
9.64	1434.62		9.64	354.228		39.68	0.000371532		87.05	0.00180098
9.65	1433.08		9.65	354.143		39.7	7.77553e-05		87.09	0.00162175
9.66	1449.17		9.66	351.542		39.72	1.90399e-05		87.17	0.00149728
9.67	1448.2		9.67	354.384		39.75	0.000245769		87.25	0.000104113
9.68	1456.57		9.68	354.085		39.77	0.000124434		87.33	0.00082014
9.69	1460.37		9.69	354.858		39.82	1.79018e-05		87.43	0.000600371
9.7	1450.46		9.7	358.204		39.88	0.166338		87.58	0.000341156
9.71	1449.7		9.71	357.958		39.92	0.000804013		87.6	0.000133771
9.72	1458.38		9.72	362.063		39.94	0.159307		87.63	0.000205065
9.73	1449.25		9.73	357.772		39.97	0.159301		87.8	0.00155146
9.74	1459.36		9.74	362.161		40.03	0.00342419		87.93	0.000263773
9.75	1460.13		9.75	363.671		40.06	0.00166228		87.96	4.68999e-05
9.76	1458.17		9.76	364.565		40.08	0.000195654		88.14	5.31686e-05
9.77	1460.67		9.77	360.615		40.11	4.41377e-05		88.31	6.73275e-05
9.78	1469.11		9.78	358.759		40.14	5.51134e-05		88.38	0.00118981
9.79	1468.13		9.79	363.09		40.16	3.36318e-05		88.47	0.0153557
9.8	1464.24		9.8	364.544		40.2	0.000508253		88.56	0.000352798
9.81	1469.56		9.81	358.174		40.26	1.79588e-05		88.59	0.00019696
9.82	1474.26		9.82	361.038		40.31	3.69642e-05		88.74	0.0021445
9.83	1477.41		9.83	364.157		40.33	0.000406864		88.85	0.00191092
9.84	1485.7		9.84	363.791		40.36	6.1761e-05		89.02	0.000194851
9.85	1488.58		9.85	357.114		40.38	0.000185506		89.12	0.000662685
9.86	1483.68		9.86	353.051		40.42	0.155221		89.19	0.000116706
9.87	1479.48		9.87	361.878		40.46	0.000638327		89.28	7.30452e-05
9.88	1477.12		9.88	365.568		40.5	0.00322185		89.36	0.00014058
9.89	1477.28		9.89	359.948		40.56	6.15913e-05		89.45	0.00115553
9.9	1479.66		9.9	361.589		40.59	0.00206072		89.52	3.51396e-05
9.91	1481.51		9.91	363.063		40.63	7.37986e-05		89.58	0.000197373
9.92	1501.39		9.92	370.89		40.65	0.00131975		89.66	0.000146094
9.93	1512.2		9.93	366.516		40.67	0.000157577		89.72	0.0020879
9.94	1508.91		9.94	368.438		40.7	0.000166291		89.76	0.00064758
9.95	1516.7		9.95	372.851		40.74	0.000187674		89.88	0.000503579
9.96	1527.61		9.96	371.447		40.77	0.000732245		90.1	0.000525107
9.97	1521.77		9.97	368.75		40.8	0.000372343		90.15	5.56709e-05
9.98	1513.82		9.98	369.589		40.83	0.000105343		90.18	4.16287e-05
9.99	1502.16		9.99	368.358		40.85	0.000522093		90.33	0.000574276
10	1503.42		10	372.934		40.88	0.000328891		90.41	0.000335477
10.01	1527.22		10.01	378.922		40.9	8.19032e-06		90.53	7.31368e-06
10.02	1537.87		10.02	371.491		40.93	0.000165964		90.55	6.02839e-05
10.03	1547.5		10.03	373.476		40.96	9.89956e-05		90.76	0.00049503
10.04	1553.88		10.04	376.065		41.01	0.000200223		90.78	0.0016367
10.05	1554.83		10.05	374.928		41.05	3.53764e-05		90.81	0.0176426
10.06	1562.51		10.06	374.81		41.1	0.000124593		91.18	6.35821e-05
10.07	1560.12		10.07	370.028		41.14	6.99046e-05		91.42	7.36569e-05
10.08	1562.61		10.08	373.275		41.18	0.000401271		91.59	9.31845e-05
10.09	1561.99		10.09	377.369		41.22	0.000203349		91.75	0.000430739
10.1	1553.47		10.1	372.703		41.26	1.75421e-05		92.14	4.506e-05
10.11	1553.17		10.11	369.486		41.29	0.000384175		92.29	3.4755e-05
10.12	1549.13		10.12	373.485		41.31	0.000203179		92.37	0.000301124
10.13	1554.5		10.13	378.077		41.33	0.00196136		92.46	0.00023059
10.14	1560.24		10.14	381.54		41.37	0.000904463		92.68	0.0001137
10.15	1577.65		10.15	387.276		41.4	2.36053e-05		92.84	0.000272123
10.16	1577.81		10.16	380.561		41.43	0.000145939		92.99	0.00011564
10.17	1571.29		10.17	386.289		41.47	0.000182005		93.17	0.000703509
10.18	1582.47		10.18	379.582		41.5	6.8566e-05		93.22	0.00656745
10.19	1578.58		10.19	381.284		41.54	0.148433		93.47	0.00125054
10.2	1578.3		10.2	385.147		41.6	3.31954e-05		93.54	0.000547279
10.21	1585.73		10.21	388.247		41.62	1.90834e-05		93.57	0.000192767
10.22	1585.71		10.22	387.116		41.65	0.000345781		94.38	9.99895e-05
10.23	1583.56		10.23	391.709		41.67	0.000399347		94.62	0.000140133
10.24	1584.71		10.24	388.85		41.69	2.34156e-05		94.66	0.000251238
10.25	1582.1		10.25	388.126		41.73	0.14761		94.82	3.87023e-07
10.26	1589.64		10.26	393.867		41.76	0.143809		94.88	0.000161423
10.27	1599.78		10.27	389.584		41.8	0.000243732		94.97	6.90131e-05
10.28	1604.59		10.28	393.284		41.82	1.34006e-06		95.03	0.00190015
10.29	1609.92		10.29	392.199		41.87	0.000142909		95.05	0.000138064
10.3	1618.54		10.3	391.596		41.89	0.14332		95.13	0.000651327
10.31	1616.65		10.31	397.172		41.97	0.00059363		95.18	0.000209243
10.32	1613.01		10.32	393.688		42	0.00030749		95.38	0.0012356
10.33	1606.58		10.33	400.194		42.03	0.142719		95.44	0.000124495
10.34	1606.82		10.34	393.734		42.1	8.71432e-06		95.51	7.01822e-05
10.35	1600.31		10.35	392.724		42.12	0.000287876		95.72	0.000535868
10.36	1601.28		10.36	395.757		42.16	0.000176432		95.75	0.000118434
10.37	1610.97		10.37	388.315		42.18	0.140957		95.81	0.000742525
10.38	1632.01		10.38	393.375		42.2	0.000152026		95.9	0.000734043
10.39	1639.69		10.39	394.808		42.24	9.37555e-05		95.92	0.000200795
10.4	1626.11		10.4	398.074		42.26	0.015328		96.04	0.000173416
10.41	1626.04		10.41	393.531		42.29	0.00729831		96.16	4.85948e-05
10.42	1638.2		10.42	396.642		42.31	0.000413076		96.3	0.000123049
10.43	1663.04		10.43	398.015		42.35	0.000232773		96.41	0.000143515
10.44	1670.35		10.44	400.101		42.38	0.000371038		96.47	0.000136412
10.45	1670.99		10.45	401.012		42.43	0.00034833		96.55	0.000734539
10.46	1673.55		10.46	396.555		42.46	9.92776e-05		96.68	0.000443599
10.47	1678.42		10.47	401.807		42.48	0.000159307		96.81	0.00117347
10.48	1679.49		10.48	395.717		42.52	9.89533e-05		96.83	0.000115589
10.49	1679.54		10.49	400.552		42.55	2.58535e-05		96.98	0.000305137
10.5	1685.51		10.5	398.008		42.57	9.53116e-06		97.09	0.00125792
10.51	1684.12		10.51	398.429		42.59	6.5383e-05		97.19	0.000120567
10.52	1686.32		10.52	395.133		42.61	5.24545e-05		97.25	6.56968e-05
10.53	1691.11		10.53	402.216		42.63	0.125456		97.4	0.000472256
10.54	1697.35		10.54	408.269		42.67	0.000226451		97.46	0.000471262
10.55	1693.63		10.55	406.506		42.69	0.000127179		97.58	0.000704234
10.56	1686.15		10.56	400.387		42.72	4.11191e-06		97.71	0.000263476
10.57	1685.84		10.57	399.73		42.75	0.00222431		97.75	2.32277e-05
10.58	1694.61		10.58	401.593		42.77	0.00113377		98.05	0.000118208
10.59	1709.08		10.59	402.862		42.81	0.122148		98.3	0.00074785
10.6	1721.29		10.6	402.925		42.84	0.121812		98.41	8.31458e-05
10.61	1716.05		10.61	404.227		42.89	0.000407636		98.44	2.86421e-05
10.62	1720.11		10.62	411.084		42.94	8.48893e-05		98.59	0.000113524
10.63	1722.32		10.63	411.106		42.97	1.04165e-05		98.67	0.00067392
10.64	1733.33		10.64	403.414		42.99	0.00379428		98.7	1.98481e-05
10.65	1718.92		10.65	409.892		43.04	0.00045774		98.79	0.0509013
10.66	1713.03		10.66	413.246		43.07	0.00283426		99.05	0.00118178
10.67	1706.91		10.67	414.192		43.1	0.00278799		99.08	2.10107e-05
10.68	1711.15		10.68	409.799		43.12	0.00141367		99.38	0.000144539
10.69	1713.95		10.69	405.498		43.17	0.00242524		99.46	2.11758e-05
10.7	1717.35		10.7	409.394		43.19	0.000919203		99.91	1.21429e-05
10.71	1719.22		10.71	411.239		43.21	0.000542613		100.09	2.22124e-05
10.72	1716.26		10.72	406.35		43.23	0.000287148		100.22	0.00049397
10.73	1716.48		10.73	408.703		43.27	9.63462e-05		100.46	0.000537573
10.74	1720.25		10.74	410.221		43.29	0.000132872		100.64	0.000876392
10.75	1732.64		10.75	413.894		43.36	0.00022298		100.87	5.88376e-05
10.76	1744.56		10.76	410.814		43.38	0.00014733		100.95	0.000496409
10.77	1751.7		10.77	411.871		43.45	1.84153e-05		101.04	0.000222334
10.78	1757.31		10.78	408.305		43.51	0.000253016		101.14	0.00116039
10.79	1763.94		10.79	415.72		43.54	0.000146493		101.24	0.000148933
10.8	1779.46		10.8	418.166		43.57	0.000148283		101.29	3.71465e-05
10.81	1763.7		10.81	418.593		43.59	4.55971e-05		101.35	0.0106081
10.82	1754.2		10.82	421.492		43.63	3.69269e-05		101.37	0.00451326
10.83	1751.04		10.83	421.497		43.66	0.114104		101.45	4.52006e-05
10.84	1765.75		10.84	422.38		43.68	0.114051		101.47	8.72181e-05
10.85	1767.66		10.85	421.052		43.72	0.0427525		101.52	0.00245036
10.86	1768.88		10.86	423.804		43.75	0.000159188		101.61	8.72467e-05
10.87	1777.68		10.87	423.898		43.77	0.000135479		101.66	0.000127153
10.88	1811.25		10.88	427.594		43.8	6.53004e-05		101.77	0.00066708
10.89	1813.76		10.89	425.213		43.82	0.0183382		101.82	0.000583692
10.9	1802.74		10.9	426.461		43.84	0.0180395		101.86	0.000148665
10.91	1806.15		10.91	431.567		43.87	0.000127602		101.95	0.000556615
10.92	1818.65		10.92	433.877		43.89	3.71656e-05		102.02	0.000884136
10.93	1812.77		10.93	426.165		43.91	0.00847699		102.12	5.76937e-05
10.94	1810.33		10.94	429.26		43.94	0.00824995		102.2	1.05863e-05
10.95	1814.28		10.95	429.794		43.96	0.00651355		102.26	0.000166723
10.96	1814.79		10.96	434.842		43.99	0.00553564		102.31	3.69721e-05
10.97	1819.79		10.97	438.829		44.03	0.00540949		102.41	0.000270122
10.98	1819.49		10.98	436.367		44.09	9.70474e-05		102.5	0.00286564
10.99	1820.12		10.99	440.919		44.13	5.02654e-05		102.58	0.00276999
11	1826.34		11	440.056		44.18	1.2549e-05		102.66	0.00645576
11.01	1830.83		11.01	438.617		44.2	0.00525713		102.83	0.00460931
11.02	1827.09		11.02	434.78		44.23	0.00124155		102.93	3.13318e-05
11.03	1831.67		11.03	432.088		44.27	0.000334555		103.01	0.000252247
11.04	1838.15		11.04	438.739		44.36	0.00060479		103.23	7.61954e-05
11.05	1837.79		11.05	437.09		44.38	0.000181348		103.41	0.00242002
11.06	1838.5		11.06	439.277		44.42	2.95901e-05		103.54	0.000645917
11.07	1841.94		11.07	439.205		44.46	4.54997e-05		103.61	0.000240985
11.08	1843.29		11.08	437.751		44.49	0.000229114		103.66	0.000330867
11.09	1846.36		11.09	441.736		44.52	0.000110713		103.69	6.38609e-05
11.1	1845.63		11.1	438.136		44.56	0.00388689		103.76	0.013113
11.11	1849.52		11.11	437.366		44.6	0.00248747		104.09	8.80156e-05
11.12	1870.83		11.12	443.063		44.62	0.00121052		104.23	0.000331689
11.13	1879.32		11.13	436.458		44.68	0.00137349		104.4	0.000353727
11.14	1886.07		11.14	438.751		44.7	0.00114983		104.58	0.000469482
11.15	1908.5		11.15	435.865		44.72	0.000579016		104.73	0.000295786
11.16	1892.14		11.16	439.43		44.75	3.81048e-05		104.77	0.000510411
11.17	1886.91		11.17	439.785		44.77	0.000103068		104.82	0.000130355
11.18	1884.06		11.18	441.138		44.79	7.70712e-05		104.95	0.000808301
11.19	1887.89		11.19	447.319		44.83	9.67115e-05		105.2	0.000361903
11.2	1884.83		11.2	451.39		44.85	0.000887702		105.25	0.000151489
11.21	1884		11.21	467.015		44.87	0.000403475		105.33	7.15573e-05
11.22	1887.81		11.22	451.083		44.93	8.73017e-06		105.46	0.00208735
11.23	1896.41		11.23	454.72		44.95	6.77898e-06		105.53	0.00163802
11.24	1885.17		11.24	452.26		44.99	3.51476e-05		105.59	0.000392265
11.25	1900.14		11.25	460.524		45.01	0.000995969		105.69	0.000397191
11.26	1907.86		11.26	463.396		45.05	1.88322e-05		105.79	0.000182148
11.27	1925.27		11.27	464.583		45.08	0.000898977		105.81	0.000152856
11.28	1931.64		11.28	456.987		45.12	9.88564e-05		105.88	0.000452065
11.29	1925.42		11.29	475.241		45.15	0.000163976		106.03	8.64647e-05
11.3	1928		11.3	474.105		45.17	3.6189e-05		106.29	0.000542954
11.31	1925.77		11.31	468.801		45.19	0.000237138		106.38	0.00370534
11.32	1932.45		11.32	472.411		45.21	6.72425e-05		106.5	0.00340946
11.33	1940.61		11.33	473.662		45.26	0.000250934		106.6	0.000235128
11.34	1938.25		11.34	475.7		45.3	5.5751e-05		106.71	0.000597426
11.35	1937.62		11.35	474.853		45.35	0.000101356		106.75	2.62402e-05
11.36	1936.77		11.36	479.1		45.38	2.00409e-06		106.91	0.000278196
11.37	1938.54		11.37	482.945		45.43	1.57675e-05		106.94	2.67448e-05
11.38	1941.08		11.38	479.628		45.47	0.00828425		107	4.97441e-05
11.39	1947.91		11.39	476.491		45.52	0.000157809		107.04	0.000115809
11.4	1947.34		11.4	478.285		45.54	3.62915e-05		107.11	0.000419621
11.41	1963.52		11.41	479.341		45.57	0.000124091		107.32	0.00023535
11.42	1974.14		11.42	482.415		45.62	9.89928e-05		107.48	0.00178894
11.43	1970.96		11.43	476.223		45.67	4.08823e-06		107.64	2.13396e-05
11.44	1966.1		11.44	482.962		45.7	0.00195971		107.67	0.0144353
11.45	1966.01		11.45	486.881		45.72	0.00097885		107.78	0.000579595
11.46	1966.16		11.46	482.436		45.75	0.00573361		108.13	0.000606983
11.47	1966.8		11.47	476.793		45.84	0.000196795		108.3	4.12858e-05
11.48	1965.53		11.48	479.926		45.88	0.00527579		108.36	8.91705e-05
11.49	1958.33		11.49	485.543		45.91	1.46973e-05		108.5	0.000102986
11.5	1972.85		11.5	487.806		45.93	0.00213655		108.6	0.000169456
11.51	1977.57		11.51	491.857		45.95	0.000991527		108.74	0.000540709
11.52	1980.49		11.52	495.54		45.99	0.000646808		109.02	0.000223389
11.53	1982.38		11.53	492.288		46.02	0.000907515		109.2	0.000161912
11.54	1984.73		11.54	496.604		46.08	0.000209754		109.39	0.000177387
11.55	1984.36		11.55	495.89		46.13	0.000230186		109.61	0.000892733
11.56	1982.43		11.56	497.634		46.16	0.000144202		109.66	0.000159465
11.57	1983.65		11.57	494.596		46.19	0.000103239		109.73	9.88598e-05
11.58	1994.99		11.58	497.888		46.27	0.00295239		109.82	5.56546e-05
11.59	1992.43		11.59	491.961		46.3	3.05636e-05		109.89	0.00177024
11.6	1997.24		11.6	495.527		46.33	0.00271607		110.03	0.000335831
11.61	1987.48		11.61	493.227		46.35	0.0025366		110.12	0.000234013
11.62	1974.9		11.62	496.843		46.37	0.00122256		110.15	2.79527e-05
11.63	1976.88		11.63	498.999		46.39	5.77647e-05		110.33	0.000697046
11.64	1976.78		11.64	499.907		46.42	3.42593e-05		110.44	0.000160382
11.65	1973.71		11.65	500.631		46.45	0.000102984		110.57	0.00425882
11.66	1964.3		11.66	500.704		46.48	9.19322e-05		110.61	0.000124863
11.67	1969.47		11.67	502.577		46.53	0.000127718		110.68	3.74659e-05
11.68	1959.3		11.68	493.628		46.55	3.55032e-05		110.79	0.00294685
11.69	1961.66		11.69	502.34		46.57	0.000144764		110.91	0.000453828
11.7	1970.72		11.7	502.844		46.62	3.78568e-05		110.95	8.34593e-05
11.71	1975.56		11.71	503.387		46.67	0.000111579		111.15	0.000116598
11.72	1975.27		11.72	495.672		46.69	6.11467e-05		111.25	0.101002
11.73	1966.34		11.73	496.995		46.71	3.56023e-05		111.3	0.000138863
11.74	1967.87		11.74	499.298		46.74	1.81983e-05		111.67	1.6819e-05
11.75	1967.45		11.75	496.877		46.78	8.30454e-06		111.87	0.000174007
11.76	1964.42		11.76	495.479		46.81	0.00918661		112.07	0.000189105
11.77	1965.68		11.77	494.066		46.83	2.47751e-05		112.14	0.000869207
11.78	1970.65		11.78	499.31		46.86	0.00909904		112.16	0.000332151
11.79	1990.26		11.79	501.593		46.88	0.00396219		112.35	0.000193007
11.8	1991.91		11.8	497.079		46.91	0.000399406		112.4	9.14546e-05
11.81	1985.38		11.81	501.581		46.93	0.000176181		112.43	6.74131e-05
11.82	1974.85		11.82	511.241		46.96	0.00120972		112.51	0.000771283
11.83	1972.87		11.83	504.708		46.98	0.000604944		112.53	0.000486114
11.84	1962.86		11.84	505.948		47.04	1.93056e-05		112.87	4.6022e-05
11.85	1948.18		11.85	508.674		47.1	0.00289045		112.93	8.73558e-05
11.86	1954.16		11.86	512.554		47.13	0.000798667		113.22	0.000290081
11.87	1967.91		11.87	511.272		47.18	0.000461049		113.3	0.000132848
11.88	1987.75		11.88	510.788		47.21	0.000277855		113.36	2.95956e-05
11.89	1991.84		11.89	515.052		47.25	7.48445e-05		113.51	4.20435e-05
11.9	1989.34		11.9	519.045		47.27	5.50438e-05		113.58	0.000336854
11.91	1975.95		11.91	519.399		47.31	0.000446297		113.7	0.00303265
11.92	1973.3		11.92	516.063		47.37	0.000421165		113.77	5.85729e-05
11.93	1971.22		11.93	519.075		47.39	0.000224593		113.9	0.0929991
11.94	1972.51		11.94	522.924		47.47	2.77598e-06		114.05	0.000293043
11.95	1976.68		11.95	521.763		47.5	5.69874e-06		114.17	0.000120708
11.96	1982.67		11.96	522.914		47.53	0.00013693		114.23	0.000141682
11.97	1981.57		11.97	524.351		47.58	3.33737e-05		114.33	0.00019068
11.98	1975.7		11.98	523.826		47.61	9.13967e-05		114.4	7.74315e-05
11.99	1975.61		11.99	525.084		47.65	0.00114351		114.58	0.000196271
12	1972.51		12	523.707		47.7	0.000513442		114.64	0.000125202
12.01	1967.25		12.01	518.311		47.76	3.84526e-05		114.71	0.000881151
12.02	1976.56		12.02	518.066		47.78	0.000178788		114.79	0.000437532
12.03	1983.95		12.03	520.075		47.83	0.000244657		114.96	0.000851239
12.04	1982.01		12.04	525.517		47.88	9.64588e-05		115.02	0.000672118
12.05	1978.56		12.05	524.345		47.9	5.99983e-05		115.12	0.000180811
12.06	1975.7		12.06	521.514		47.92	0.00061309		115.24	0.000189587
12.07	1981.6		12.07	523.597		47.97	0.000285124		115.3	0.000763106
12.08	1979.18		12.08	529.857		47.99	3.18887e-05		115.35	0.00533901
12.09	1981.08		12.09	534.461		48.02	0.000207639		115.41	0.00724143
12.1	1999.08		12.1	531.788		48.04	7.99906e-05		115.46	0.00254786
12.11	1991.71		12.11	528.665		48.09	0.000248087		115.58	5.72483e-05
12.12	1992.45		12.12	527.362		48.12	0.000194038		115.7	0.0484043
12.13	1995.15		12.13	525.218		48.2	2.38644e-05		116.14	0.000359605
12.14	2005.07		12.14	520.258		48.28	0.000160303		116.22	0.000138483
12.15	2000.7		12.15	524.3		48.32	0.000132829		116.52	0.000203032
12.16	1996.43		12.16	528.583		48.35	0.00076724		116.59	0.000324497
12.17	1989.68		12.17	531.533		48.37	0.000492532		116.69	0.000605114
12.18	1988.35		12.18	532.384		48.39	0.000372827		116.8	0.000280519
12.19	1988.51		12.19	536.13		48.42	1.05852e-05		116.86	0.00111548
12.2	1989.22		12.2	539.484		48.45	5.53783e-05		116.9	0.000334249
12.21	1993.57		12.21	532.29		48.5	2.46213e-05		116.93	0.000236304
12.22	1994.14		12.22	532.745		48.53	5.66984e-05		116.99	2.5087e-05
12.23	1997.01		12.23	531.806		48.55	0.00132035		117.05	0.00018674
12.24	1990.7		12.24	534.838		48.57	0.000656314		117.11	2.71195e-05
12.25	2010.77		12.25	530.016		48.59	5.89153e-05		117.21	0.00564125
12.26	2019.62		12.26	531.343		48.63	0.000469934		117.25	0.00190359
12.27	2016.69		12.27	538.182		48.65	0.000289781		117.5	0.000187058
12.28	2019.04		12.28	539.446		48.67	9.93133e-05		117.61	0.000184989
12.29	2016.78		12.29	539.55		48.69	1.94269e-05		117.85	0.000290813
12.3	2016.22		12.3	542.198		48.71	5.89283e-05		118.02	0.000100466
12.31	2012.03		12.31	542.385		48.75	4.71737e-05		118.04	0.000231755
12.32	2004.68		12.32	544.84		48.77	0.000142212		118.1	0.000218196
12.33	2009.42		12.33	539.447		48.81	0.000143262		118.18	0.000136815
12.34	2015.27		12.34	547.041		48.87	6.43026e-05		118.27	0.00136246
12.35	2027.99		12.35	545.222		48.95	0.00289455		118.33	0.000122605
12.36	2014.96		12.36	548.985		48.98	0.00149799		118.45	0.000277915
12.37	2014.97		12.37	549.608		49.04	0.000128274		118.49	4.87596e-05
12.38	2019.2		12.38	545.862		49.07	3.91703e-05		118.59	0.00167368
12.39	2020.85		12.39	548.564		49.1	1.22871e-05		118.65	1.94585e-07
12.4	2043.02		12.4	549.27		49.14	1.76312e-05		118.74	0.000665347
12.41	2041.3		12.41	551.842		49.17	1.37425e-05		118.85	0.000372199
12.42	2048.79		12.42	552.221		49.19	3.8769e-05		118.9	0.0034834
12.43	2056.31		12.43	549.606		49.21	0.000222577		119.11	0.000205845
12.44	2059.79		12.44	554.364		49.32	6.55516e-05		119.42	0.000557215
12.45	2057.6		12.45	550.016		49.34	0.000116287		119.78	0.0013172
12.46	2059.36		12.46	558.914		49.36	0.000451596		119.83	6.61724e-05
12.47	2059.05		12.47	562.726		49.39	0.000418015		119.98	6.27686e-05
12.48	2066.59		12.48	553.773		49.44	0.000397155		120.08	0.000544146
12.49	2059.56		12.49	568.386		49.47	0.000220941		120.24	0.000330987
12.5	2059.71		12.5	563.955		49.5	3.46031e-06		120.56	0.000368792
12.51	2056.5		12.51	560.652		49.53	0.00358459		120.66	0.000141131
12.52	2066.49		12.52	555.015		49.59	0.00187478		120.76	3.41945e-05
12.53	2070		12.53	557.862		49.61	0.00166192		120.87	1.11688e-05
12.54	2076.76		12.54	557.66		49.65	0.000139206		121.07	0.000471958
12.55	2092.51		12.55	556.835		49.71	0.00120574		121.16	0.0293098
12.56	2103.48		12.56	557.636		49.75	0.000613993		121.26	0.0292261
12.57	2084.85		12.57	564.813		49.78	6.98283e-05		121.36	0.00167573
12.58	2075.76		12.58	559.295		49.82	3.3516e-05		121.72	1.25766e-05
12.59	2072.09		12.59	560.021		49.87	0.00117958		121.91	0.00024191
12.6	2078.82		12.6	562.17		49.93	0.00114742		122.13	1.96367e-05
12.61	2091.23		12.61	560.464		49.96	0.000977475		122.19	0.000372869
12.62	2078.63		12.62	570.296		49.99	0.000396493		122.36	4.3695e-05
12.63	2078.28		12.63	567.973		50.02	0.000414769		122.5	0.00288368
12.64	2079.75		12.64	564.996		50.04	2.39801e-05		122.59	2.7528e-05
12.65	2092.03		12.65	567.987		50.08	2.67792e-05		122.72	0.000204581
12.66	2083.8		12.66	563.417		50.11	0.000288299		122.84	0.020755
12.67	2093.11		12.67	556.638		50.14	3.68321e-05		122.88	0.0207395
12.68	2086.56		12.68	556.456		50.17	3.3406e-05		122.93	5.38811e-05
12.69	2079.91		12.69	565.756		50.21	0.000113552		122.96	0.000123717
12.7	2069.86		12.7	564.703		50.23	3.05456e-06		123.05	5.29933e-06
12.71	2072.38		12.71	566.135		50.25	0.00115387		123.12	9.94368e-05
12.72	2092.01		12.72	566.556		50.33	0.00112878		123.21	0.000282295
12.73	2098.79		12.73	576.265		50.35	0.000571143		123.31	0.000668598
12.74	2097.77		12.74	576.396		50.37	1.35917e-05		123.5	0.000794088
12.75	2094.06		12.75	591.85		50.41	0.000509207		123.56	6.89456e-05
12.76	2093.03		12.76	586.871		50.44	0.00020895		123.6	4.50919e-05
12.77	2095.99		12.77	580.812		50.49	2.30209e-05		123.62	0.000226581
12.78	2086.06		12.78	580.192		50.52	4.83502e-05		123.76	8.14583e-05
12.79	2092.82		12.79	583.409		50.58	0.000453458		123.84	2.92956e-05
12.8	2103.77		12.8	576.585		50.61	0.000199482		123.93	0.000471366
12.81	2108.01		12.81	572.843		50.64	8.47983e-05		123.98	0.000415088
12.82	2095.91		12.82	577.036		50.69	9.73214e-05		124.16	0.00687199
12.83	2090.44		12.83	582.751		50.78	0.000473225		124.3	0.00136044
12.84	2094.26		12.84	582.159		50.81	0.000262183		124.34	0.00022197
12.85	2096.37		12.85	602.432		50.86	1.0273e-05		124.36	0.000164718
12.86	2093.98		12.86	599.89		50.92	0.00010598		124.47	0.000135296
12.87	2093.95		12.87	601.935		50.97	4.96107e-05		124.52	0.00396442
12.88	2095.16		12.88	582.48		51.04	0.000681062		124.58	0.00101491
12.89	2095.74		12.89	588.972		51.12	0.000657094		124.71	0.000399935
12.9	2083.18		12.9	601.82		51.15	0.000618064		124.82	4.23018
12.91	2071.63		12.91	604.305		51.17	0.000327691		124.88	3.20045e-05
12.92	2081.56		12.92	605.787		51.19	4.4534e-05		125.47	0.000307935
12.93	2078.77		12.93	597.297		51.24	3.62054e-05		125.64	7.37001e-05
12.94	2070.75		12.94	606.379		51.28	0.000154368		125.79	2.6223e-05
12.95	2067.17		12.95	608.653		51.31	0.000125894		125.81	1.19522e-05
12.96	2069.6		12.96	604.927		51.34	0.000523127		125.96	1.45317e-05
12.97	2077.62		12.97	599.275		51.36	0.000235646		126.24	2.75392e-05
12.98	2077.15		12.98	598.883		51.41	6.92444e-05		126.35	4.9413e-05
12.99	2074.6		12.99	606.701		51.45	1.327e-05		126.39	1.41362e-06
13	2065.08		13	613.433		51.48	2.9842e-05		126.56	0.000123298
13.01	2058.14		13.01	613.836		51.52	0.000127525		126.61	0.000113996
13.02	2058.03		13.02	607.241		51.54	0.000128023		126.79	0.00137906
13.03	2071.59		13.03	600.639		51.56	6.32842e-05		126.88	0.00133689
13.04	2072.43		13.04	576.27		51.59	0.000132537		126.99	0.000266429
13.05	2085.53		13.05	562.884		51.62	7.2011e-05		127.16	0.000162276
13.06	2079.97		13.06	562.722		51.66	0.000291893		127.27	0.00118111
13.07	2067.61		13.07	563.024		51.68	0.000197801		127.47	0.000220546
13.08	2057.73		13.08	556.583		51.7	0.033811		127.62	7.55505e-05
13.09	2067.69		13.09	563.282		51.76	0.000422305		127.9	0.000249706
13.1	2071.77		13.1	568.779		51.79	0.000322254		127.98	0.0017699
13.11	2072.34		13.11	569.204		51.83	0.000246947		128	0.000118121
13.12	2074.48		13.12	567.791		51.87	0.0331578		128.12	0.00537503
13.13	2071.83		13.13	564.57		51.9	0.0329944		128.37	0.000691959
13.14	2067.9		13.14	571.929		51.95	0.00180428		128.57	0.000170069
13.15	2067.27		13.15	571.071		51.97	0.000866106		128.74	0.000120383
13.16	2068.35		13.16	567.504		51.99	0.00011315		128.87	0.00019226
13.17	2063.15		13.17	573.339		52.01	0.0305638		128.91	0.000162515
13.18	2053.39		13.18	571.773		52.03	0.0303099		129.05	0.00119363
13.19	2047.75		13.19	575.789		52.07	0.0265484		129.09	0.000257761
13.2	2049.86		13.2	575.008		52.13	0.000339586		129.12	1.66949e-05
13.21	2050.82		13.21	577.953		52.17	0.000137145		129.27	0.000262985
13.22	2050.7		13.22	599.853		52.2	0.0259876		129.41	0.00327045
13.23	2047.18		13.23	608.747		52.23	9.75631e-05		129.49	0.00068757
13.24	2044.18		13.24	616.113		52.26	3.62886e-05		129.59	0.000300025
13.25	2044.28		13.25	618.524		52.34	3.29357e-05		129.62	9.48714e-06
13.26	2041.87		13.26	618.982		52.44	0.025658		129.74	2.86808
13.27	2055.82		13.27	616.253		52.47	0.0124538		129.93	0.000114491
13.28	2050.39		13.28	613.57		52.5	3.67341e-06		130.09	0.000507357
13.29	2037.64		13.29	616.481		52.54	0.00073518		130.22	2.76364e-05
13.3	2046.18		13.3	618.148		52.58	0.000401711		130.38	0.000142739
13.31	2047.75		13.31	622.666		52.61	8.72894e-05		130.43	0.000210539
13.32	2057.36		13.32	624.6		52.66	1.45262e-05		130.6	8.80847e-05
13.33	2061.74		13.33	627.261		52.68	0.000199649		130.7	0.000167231
13.34	2059.7		13.34	618.631		52.7	0.000127206		130.75	0.000104073
13.35	2045.89		13.35	621.552		52.74	8.22189e-05		131.14	0.00105237
13.36	2036.9		13.36	626.308		52.78	0.000425269		131.36	0.0120464
13.37	2026.13		13.37	625.539		52.83	0.000180164		131.65	0.000113226
13.38	2027.46		13.38	626.019		52.87	8.86172e-06		131.8	0.0035755
13.39	2035.41		13.39	625.591		52.91	6.11789e-05		131.95	8.96646e-05
13.4	2043.23		13.4	630.566		52.93	2.28742e-05		132.16	0.00150515
13.41	2032.05		13.41	639.373		52.96	0.000298052		132.38	0.000129751
13.42	2048.52		13.42	623.023		52.98	0.000263061		132.56	9.09435e-05
13.43	2038.74		13.43	629.139		53	0.000146178		132.62	1.29586e-05
13.44	2022.62		13.44	632.066		53.05	7.51725e-06		132.66	8.60451e-05
13.45	2015.74		13.45	631.705		53.07	0.00261007		132.73	0.000606258
13.46	2018.2		13.46	628.682		53.1	0.00251535		132.87	0.000108869
13.47	2025.5		13.47	628.791		53.16	0.00248578		132.97	0.000164404
13.48	2035.94		13.48	630.451		53.21	0.00130007		133.18	0.000244252
13.49	2027.15		13.49	630.87		53.24	5.84876e-05		133.24	7.15667e-06
13.5	2021.8		13.5	626.338		53.29	0.000524531		133.27	3.32296e-05
13.51	2006.32		13.51	629.826		53.33	0.00024962		133.39	3.55252e-05
13.52	1998.45		13.52	635.406		53.37	1.42919e-05		133.47	0.000240139
13.53	2005.3		13.53	641.552		53.46	5.44809e-05		133.49	4.54664e-05
13.54	2014.91		13.54	643.666		53.53	3.346e-05		133.64	0.00818037
13.55	2016.87		13.55	636.328		53.58	2.09071e-05		133.68	0.033746
13.56	2010.46		13.56	641.972		53.6	0.000270395		133.9	2.24268e-05
13.57	1997.6		13.57	640.665		53.66	0.000108304		134.03	5.59893e-05
13.58	1988.75		13.58	632.332		53.7	1.44176e-05		134.36	0.000114575
13.59	1993.46		13.59	634.365		53.74	0.000151461		134.83	0.000108618
13.6	1991.89		13.6	640.366		53.8	9.52041e-05		134.99	0.00293486
13.61	1987.25		13.61	647.032		53.84	2.80172e-05		135.08	4.06091e-05
13.62	1989.48		13.62	647.707		53.91	0.00134004		135.19	0.000134629
13.63	1987.36		13.63	648.725		53.95	0.000494849		135.25	0.000952604
13.64	1985.91		13.64	648.361		53.97	0.000159408		135.46	0.000130098
13.65	1985.44		13.65	646.298		54	0.000176372		135.62	8.51499e-06
13.66	1979.44		13.66	646.172		54.04	3.83626e-05		135.67	3.75359e-05
13.67	1966.29		13.67	638.143		54.1	1.40923e-05		135.92	0.000128897
13.68	1954.27		13.68	648.729		54.15	7.96931e-05		135.94	0.000125494
13.69	1943.58		13.69	652.18		54.2	2.32347e-05		136.07	4.10433e-05
13.7	1940.3		13.7	648.849		54.24	0.000402616		136.25	0.000850286
13.71	1945.84		13.71	648.119		54.29	0.000100128		136.31	0.000264155
13.72	1945.11		13.72	649.415		54.34	5.28104e-05		136.49	0.000644723
13.73	1942.58		13.73	648.383		54.36	0.00010408		136.69	0.00108259
13.74	1935.93		13.74	653.492		54.43	0.000200658		136.81	7.32911e-05
13.75	1932.23		13.75	652.854		54.5	0.000171893		136.92	0.00102013
13.76	1926.73		13.76	654.804		54.54	0.000100987		136.94	0.000314915
13.77	1926.75		13.77	649.353		54.56	0.000425565		137.13	0.0272646
13.78	1928.98		13.78	655.773		54.61	7.32898e-05		137.18	0.000140809
13.79	1944.91		13.79	652.924		54.64	1.59811e-05		137.23	9.32117e-05
13.8	1955.18		13.8	665.409		54.69	0.000192826		137.33	5.82427e-05
13.81	1958.27		13.81	674.193		54.75	0.000134143		137.45	0.000495778
13.82	1963.2		13.82	679.143		54.78	7.33544e-05		137.47	0.000606088
13.83	1962.02		13.83	679.281		54.82	2.00178e-05		137.67	0.000220896
13.84	1957.15		13.84	689.319		54.86	3.8763e-05		137.79	0.000149739
13.85	1953.12		13.85	695.401		54.88	6.93027e-05		137.88	0.00166556
13.86	1945.33		13.86	697.751		54.92	6.42692e-05		137.99	0.00107526
13.87	1939.07		13.87	691.199		54.95	0.000408245		138.14	0.00164182
13.88	1937.5		13.88	681.62		54.98	0.000129759		138.16	0.00153667
13.89	1931.94		13.89	688.462		55.01	0.000116148		138.25	0.000263829
13.9	1928.72		13.9	694.128		55.03	0.000260291		138.35	0.000819288
13.91	1932.43		13.91	695.322		55.09	4.93715e-05		138.59	0.000707135
13.92	1936.84		13.92	696.811		55.12	0.000130352		138.62	0.000550539
13.93	1939.34		13.93	697.718		55.15	0.000621478		138.69	0.000389293
13.94	1937.93		13.94	704.322		55.2	0.000198406		138.71	0.000216545
13.95	1944.4		13.95	694.081		55.24	7.27246e-05		138.75	0.000625534
13.96	1935.45		13.96	687.375		55.29	0.000248663		138.83	0.00060529
13.97	1934.6		13.97	681.449		55.34	0.000339664		138.95	3.05701e-05
13.98	1928.98		13.98	678.346		55.36	1.52812e-05		139.04	0.00868646
13.99	1919.12		13.99	676.259		55.4	3.86277e-05		139.1	0.00348487
14	1917		14	671.961		55.42	0.000215619		139.34	0.000663849
14.01	1917.38		14.01	671.945		55.45	0.000136932		139.41	0.000225841
14.02	1913.5		14.02	674.019		55.5	0.381801		139.49	0.000187981
14.03	1892.32		14.03	681.22		55.53	0.000176065		139.87	0.000286719
14.04	1902.16		14.04	682.643		55.57	0.381309		140.14	2.49534e-05
14.05	1920.14		14.05	684.697		55.68	0.0667177		140.23	0.000385855
14.06	1925.21		14.06	690.844		55.71	0.065128		140.3	0.00021979
14.07	1923.48		14.07	694.754		55.75	0.0329874		140.32	1.10799e-05
14.08	1910.43		14.08	693.671		55.82	0.000760612		140.41	0.000805529
14.09	1896.17		14.09	696.644		55.84	0.00033458		140.48	0.000585444
14.1	1877.05		14.1	695.567		55.91	0.000134751		140.58	9.22602e-05
14.11	1878.52		14.11	700.548		55.95	5.26862e-05		140.84	0.000902381
14.12	1885.82		14.12	693.85		55.97	2.47577e-05		140.87	7.44298e-05
14.13	1887.57		14.13	697.138		56	0.000209656		140.97	3.27143e-05
14.14	1905.31		14.14	699.516		56.03	0.000536124		141.04	0.000194798
14.15	1891.33		14.15	702.085		56.07	0.000303749		141.1	5.47615e-05
14.16	1877.69		14.16	705.919		56.11	0.000302894		141.15	0.000149445
14.17	1865.68		14.17	700.573		56.14	0.000122297		141.26	0.000144738
14.18	1856.64		14.18	701.157		56.18	1.27909e-07		141.39	0.000554953
14.19	1846.51		14.19	701.465		56.21	7.42953e-05		141.44	0.00127033
14.2	1841.34		14.2	714.062		56.28	4.59039e-06		141.55	0.00277211
14.21	1848.83		14.21	710.592		56.32	1.06846e-05		141.62	0.00010085
14.22	1841.67		14.22	707.081		56.37	1.10264e-05		141.72	0.00296205
14.23	1846.2		14.23	727.076		56.4	0.27309		141.87	0.00131284
14.24	1858.32		14.24	727.413		56.45	8.47632e-05		141.89	0.000420648
14.25	1864.4		14.25	729.456		56.52	0.000173459		142.06	0.00315426
14.26	1854.93		14.26	730.93		56.56	0.000122877		142.09	0.207212
14.27	1853.87		14.27	731.515		56.62	9.46483e-05		142.41	4.5329e-05
14.28	1855.23		14.28	720.489		56.64	0.272728		142.49	1.47365e-05
14.29	1857.94		14.29	708.668		56.69	0.272637		142.85	8.73096e-07
14.3	1851.07		14.3	728.05		56.75	0.272538		142.88	0.000150491
14.31	1844.5		14.31	724.968		56.78	0.000857676		143	3.21993e-05
14.32	1840.87		14.32	717.292		56.8	0.270707		143.07	6.15691e-05
14.33	1842.63		14.33	727.312		56.82	5.41819e-05		143.22	0.000192614
14.34	1836.79		14.34	730.571		56.84	0.270097		143.39	0.000169621
14.35	1855.21		14.35	729.466		56.89	0.00013607		143.46	0.000124174
14.36	1846.93		14.36	731.556		56.93	0.000278631		143.65	6.61508e-05
14.37	1850.2		14.37	734.025		56.95	6.77409e-05		143.73	0.000101975
14.38	1859.41		14.38	733.69		56.98	4.0326e-05		143.93	0.000662742
14.39	1861.81		14.39	731.88		57.04	4.58174e-05		144.05	0.00060061
14.4	1850.54		14.4	713.916		57.08	4.28398e-05		144.13	2.56816e-05
14.41	1844.19		14.41	698.274		57.1	0.269596		144.38	0.00120712
14.42	1841.8		14.42	692.969		57.19	0.0378281		144.47	0.000177226
14.43	1840.73		14.43	699.599		57.21	0.00288489		144.58	0.000697321
14.44	1845.02		14.44	690.862		57.24	0.00267888		144.67	9.74528e-05
14.45	1834.56		14.45	688.965		57.29	0.000787224		144.74	0.000298861
14.46	1838.93		14.46	687.695		57.33	0.000354089		144.94	1.93935e-05
14.47	1791.25		14.47	687.657		57.38	0.0018442		144.97	0.000203933
14.48	1768.92		14.48	690.328		57.4	0.00106583		145.07	0.179398
14.49	1783.11		14.49	690.171		57.43	5.54049e-05		145.18	7.19688e-05
14.5	1765.2		14.5	688.931		57.46	0.000132483		145.26	0.000213422
14.51	1758.56		14.51	693.301		57.49	6.25945e-05		145.37	2.81882e-05
14.52	1749.73		14.52	698.873		57.54	2.09504e-05		145.68	0.00011773
14.53	1739.83		14.53	712.894		57.62	0.0347231		145.76	0.000338972
14.54	1732.58		14.54	720.352		57.65	0.00586048		145.89	0.000302949
14.55	1721.86		14.55	721.313		57.71	8.80768e-05		146.15	0.000158082
14.56	1729.14		14.56	733.117		57.73	0.00384354		146.28	0.000398327
14.57	1727.69		14.57	734.571		57.76	0.00246068		146.41	0.000191762
14.58	1719.91		14.58	735.637		57.81	0.00126177		146.64	0.000202004
14.59	1712.25		14.59	740.82		57.84	0.00126067		146.75	0.000136725
14.6	1707.17		14.6	754.198		57.86	0.000674832		146.89	0.00019543
14.61	1711.48		14.61	751.24		57.89	5.07306e-06		146.93	4.95863e-05
14.62	1714.8		14.62	750.739		57.93	0.000168648		147.14	0.000152525
14.63	1708.97		14.63	749.284		57.98	0.000172867		147.17	8.68017e-05
14.64	1708.85		14.64	745.605		58.04	0.000172566		147.28	0.00202264
14.65	1702.27		14.65	750.66		58.1	0.00131815		147.39	2.31214e-06
14.66	1691.09		14.66	748.784		58.15	0.000723065		147.46	6.47021e-05
14.67	1684.36		14.67	751.881		58.2	0.0190962		147.6	0.000377753
14.68	1685.89		14.68	747.606		58.24	0.000362816		147.75	0.00970677
14.69	1679.92		14.69	746.755		58.28	0.00022313		147.79	0.00162372
14.7	1688.29		14.7	743.6		58.32	0.0180203		147.86	0.000136966
14.71	1686.92		14.71	741.508		58.36	0.0159962		148	2.43688e-05
14.72	1680.49		14.72	744.334		58.44	0.0158837		148.07	0.000224213
14.73	1670.5		14.73	747.859		58.48	0.0157823		148.24	0.000335654
14.74	1665.84		14.74	749.732		58.53	0.0155888		148.4	0.00113452
14.75	1647.93		14.75	748.688		58.55	0.0151823		148.43	0.000264755
14.76	1635.66		14.76	751.291		58.58	0.0150167		148.48	3.80584e-05
14.77	1621.94		14.77	749.682		58.62	0.0148822		148.57	2.26288e-06
14.78	1642.19		14.78	750.333		58.69	0.00312501		148.62	0.000436125
14.79	1647.06		14.79	750.891		58.71	0.00162336		148.66	0.000411415
14.8	1635.84		14.8	756.102		58.73	0.00183685		148.76	8.41863e-07
14.81	1624.17		14.81	762.455		58.79	0.00162049		148.89	0.000308654
14.82	1631.88		14.82	772.415		58.82	0.00152829		148.93	0.0017457
14.83	1625.21		14.83	768.305		58.85	0.000167725		149.06	8.88107e-05
14.84	1626.71		14.84	766.451		58.91	8.75961e-05		149.1	5.89189e-05
14.85	1614.81		14.85	768.734		58.95	0.00109042		149.19	0.000534049
14.86	1605.55		14.86	776.248		58.98	0.000563798		149.25	0.000437559
14.87	1599.35		14.87	767.322		59.03	1.75707e-05		149.31	0.000469555
14.88	1604.4		14.88	769.924		59.07	5.38787e-05		149.34	3.22954e-05
14.89	1595.48		14.89	777.59		59.11	7.54356e-05		149.4	0.000405471
14.9	1591.08		14.9	778.661		59.2	0.0098919		149.47	0.000370453
14.91	1602.14		14.91	779.584		59.23	0.00495414		149.57	0.000620923
14.92	1610.62		14.92	774.453		59.29	8.3602e-06		149.73	0.000824131
14.93	1610.25		14.93	779.739		59.36	8.7587e-05		149.77	0.000196635
14.94	1608.25		14.94	779.593		59.39	0.000225038		149.88	0.000131625
14.95	1613.65		14.95	778.17		59.44	0.000100342		150.07	0.000815283
14.96	1605.08		14.96	781.851		59.5	0.00196697		150.1	8.45675e-06
14.97	1598.98		14.97	780.561		59.52	0.00185078		150.2	0.0639386
14.98	1597.12		14.98	778.116		59.55	0.000960154		150.3	0.00017558
14.99	1590.07		14.99	773.953		59.57	4.88984e-05		150.6	0.000770703
15	1578.96		15	764.329		59.63	0.000528113		150.73	0.000418512
15.01	1582.13		15.01	777.803		59.65	0.00024709		150.87	0.000199748
15.02	1579.57		15.02	774.693		59.7	0.000365637		150.94	6.00656e-05
15.03	1589.45		15.03	774.678		59.73	0.000218165		151	4.01354e-05
15.04	1581.5		15.04	772.424		59.76	0.00880904		151.03	6.57313e-05
15.05	1581.34		15.05	776.553		59.81	0.00696713		151.21	0.000230066
15.06	1563.53		15.06	781.842		59.84	0.000633435		151.29	5.54716e-05
15.07	1560.36		15.07	771.084		59.9	2.31144e-05		151.37	5.6393e-05
15.08	1566.44		15.08	775.476		59.94	0.00580966		151.64	0.00304015
15.09	1566.36		15.09	780.328		59.98	0.00442691		151.77	1.43447e-05
15.1	1557.45		15.1	778.838		60.02	0.000995954		151.81	0.00016519
15.11	1561.25		15.11	781.481		60.07	7.44318e-05		152.1	0.000204967
15.12	1561.28		15.12	795.474		60.1	4.89039e-05		152.27	0.00129
15.13	1558.38		15.13	799.13		60.16	0.00247396		152.44	0.00124142
15.14	1554.83		15.14	793.041		60.19	0.00223201		152.57	9.49974e-05
15.15	1548.48		15.15	786.478		60.24	5.20936e-06		152.62	0.00280896
15.16	1540.8		15.16	779.256		60.27	0.000166205		152.71	0.00276747
15.17	1540.78		15.17	781.198		60.29	0.00193336		152.82	0.000402057
15.18	1548.87		15.18	785.189		60.35	0.000979577		152.87	0.002774
15.19	1543.77		15.19	786.52		60.39	9.28571e-05		152.97	3.80742e-05
15.2	1545.37		15.2	784.558		60.41	6.45018e-05		153.05	0.0444237
15.21	1539.82		15.21	780.864		60.45	3.39784e-05		153.15	0.000568413
15.22	1530.5		15.22	782.776		60.5	8.82944e-06		153.17	0.000128149
15.23	1528.41		15.23	792.331		60.53	1.31584e-05		153.4	4.21006e-05
15.24	1521.69		15.24	795.498		60.56	0.000143959		153.55	9.25867e-05
15.25	1519.66		15.25	798.705		60.61	0.000139719		153.85	5.42465e-05
15.26	1542.6		15.26	796.648		60.66	0.000205702		153.99	9.22196e-05
15.27	1540.23		15.27	801.066		60.69	8.46029e-05		154.19	0.000188096
15.28	1538.88		15.28	795.979		60.74	0.000560312		154.29	0.000196331
15.29	1536.38		15.29	794.721		60.76	0.00032987		154.49	0.000148415
15.3	1538.89		15.3	794.433		60.83	0.000201528		154.8	5.8634e-05
15.31	1535.16		15.31	796.157		60.86	0.000141527		154.91	1.30561e-05
15.32	1527.37		15.32	793.003		60.95	0.000195744		155.11	2.07584e-05
15.33	1519.24		15.33	790.9		61	9.59093e-05		155.24	0.00106101
15.34	1529.91		15.34	793.076		61.02	4.06897e-05		155.31	6.34551e-05
15.35	1532.53		15.35	800.496		61.07	6.00634e-05		155.5	8.70193e-05
15.36	1511.45		15.36	810.347		61.12	1.30602e-05		155.68	2.39492e-05
15.37	1502.34		15.37	803.206		61.14	0.000165338		155.73	6.74244e-05
15.38	1499.75		15.38	807.674		61.18	2.76536e-05		155.83	0.00174864
15.39	1503.41		15.39	802.035		61.21	8.18482e-05		155.96	0.000293244
15.4	1518.58		15.4	810.121		61.24	0.000304166		156.05	0.000241972
15.41	1523.09		15.41	814.324		61.26	7.98729e-05		156.07	7.59149e-05
15.42	1515.19		15.42	807.491		61.29	0.00013618		156.25	5.06358e-05
15.43	1515.06		15.43	810.094		61.31	0.00055225		156.32	0.000222716
15.44	1488.85		15.44	805.453		61.33	0.000280132		156.43	3.60413e-05
15.45	1487.6		15.45	803.741		61.37	9.06035e-05		156.53	3.20694e-05
15.46	1479.31		15.46	800.377		61.41	0.000150249		156.57	9.96113e-05
15.47	1487.06		15.47	803.427		61.45	0.000247088		156.64	0.000409838
15.48	1492.63		15.48	809.596		61.48	7.85957e-05		156.85	0.000324282
15.49	1507.28		15.49	811.306		61.53	0.000341837		156.94	0.000126888
15.5	1499.79		15.5	821.814		61.57	0.000125419		157.17	0.000641336
15.51	1522.83		15.51	820.366		61.62	8.23746e-05		157.31	0.000215287
15.52	1507.81		15.52	816.671		61.69	0.000159894		157.38	6.70957e-05
15.53	1517.24		15.53	833.643		61.75	0.0667208		157.51	0.000459564
15.54	1494.68		15.54	838.001		61.8	0.0666865		157.57	0.0195502
15.55	1489.85		15.55	837.437		61.85	0.063154		157.64	0.0189279
15.56	1498.07		15.56	834.555		61.91	0.0196099		157.81	0.00153411
15.57	1515.05		15.57	841.375		61.97	0.00177522		157.94	8.11223e-05
15.58	1497.95		15.58	839.161		62.03	0.000867038		158.21	0.000159203
15.59	1507.25		15.59	842.356		62.05	0.000449779		158.32	2.28087e-05
15.6	1497.71		15.6	838.486		62.07	0.000146221		158.41	0.0167419
15.61	1473.94		15.61	844.148		62.09	6.71883e-05		158.5	0.014617
15.62	1478.88		15.62	833.895		62.12	1.04699e-05		158.56	0.000447815
15.63	1477.49		15.63	852.879		62.15	0.000595262		158.6	0.00011096
15.64	1478.7		15.64	840.529		62.22	0.000267841		158.66	8.89986e-06
15.65	1481.2		15.65	840.487		62.27	4.91052e-05		158.73	2.4287e-06
15.66	1480.94		15.66	834.159		62.34	4.13758e-05		158.79	0.000406159
15.67	1474.66		15.67	826.801		62.42	0.0157966		159.01	5.14888e-05
15.68	1474.04		15.68	844.464		62.47	0.0017266		159.09	0.000283678
15.69	1481.96		15.69	840.293		62.52	0.00160136		159.14	0.00079313
15.7	1483.88		15.7	833.939		62.54	0.00148797		159.23	8.08057e-06
15.71	1473.24		15.71	831.272		62.57	0.000707381		159.28	1.37089e-05
15.72	1474.84		15.72	844.233		62.59	5.12002e-05		159.3	2.41312e-05
15.73	1467.1		15.73	843.115		62.66	8.26722e-05		159.4	0.000111532
15.74	1468.65		15.74	841.253		62.72	0.00835612		159.53	9.49066e-05
15.75	1469.77		15.75	832.282		62.76	0.00495316		159.61	0.0113294
15.76	1477.28		15.76	845.138		62.78	0.00224514		159.63	3.92748e-05
15.77	1475.68		15.77	832.175		62.8	0.00061955		159.68	0.000257805
15.78	1479.89		15.78	833.968		62.82	0.000334914		159.88	0.00010508
15.79	1482.66		15.79	845.084		62.84	0.000151128		159.99	0.00153753
15.8	1496.19		15.8	848.22		62.87	0.00307108		160.11	0.000384884
15.81	1488.31		15.81	855.612		62.91	0.00157751		160.2	6.79697e-05
15.82	1504.3		15.82	855.741		62.95	1.66954e-06		160.29	0.00145682
15.83	1502.7		15.83	856.769		62.99	1.72452e-06		160.32	3.55844e-05
15.84	1499.55		15.84	860.068		63.01	4.4772e-05		160.37	0.00136286
15.85	1495.72		15.85	868.839		63.03	0.0056632		160.44	0.00049566
15.86	1492.96		15.86	873.431		63.11	0.00135009		160.48	0.000210438
15.87	1496		15.87	871.774		63.16	0.000571483		160.61	6.82788e-05
15.88	1480.93		15.88	876.05		63.18	0.000125183		160.73	0.000198159
15.89	1484.11		15.89	876.245		63.22	0.000130048		160.77	9.66928e-05
15.9	1476		15.9	871.513		63.27	0.00117624		160.87	0.000167705
15.91	1467.44		15.91	867.283		63.31	0.000554684		160.94	1.6272e-05
15.92	1468.08		15.92	869.222		63.33	3.12608e-05		161.03	0.000346901
15.93	1468.46		15.93	871.352		63.36	0.000102647		161.1	0.000150924
15.94	1469.55		15.94	868.633		63.39	5.09312e-05		161.19	0.000262452
15.95	1476.04		15.95	866.798		63.42	0.00294597		161.24	0.000218518
15.96	1476.32		15.96	868.973		63.48	0.00254226		161.44	0.00124492
15.97	1473.13		15.97	867.368		63.51	0.000997831		161.48	0.00174678
15.98	1474.96		15.98	867.179		63.56	0.000131504		161.53	4.07e-05
15.99	1473.65		15.99	870.967		63.59	0.000494108		161.57	0.000105254
16	1468.29		16	874.711		63.63	0.000196204		161.75	0.00184342
16.01	1464.84		16.01	880.976		63.67	0.000181863		161.79	0.000156382
16.02	1467.13		16.02	886.071		63.73	0.00176638		161.9	0.00155983
16.03	1462.37		16.03	886.982		63.78	0.000705391		161.94	3.63752e-05
16.04	1467.08		16.04	889.446		63.8	0.00066622		161.97	0.000370604
16.05	1469.67		16.05	892.265		63.82	0.000401516		162.13	1.12355e-05
16.06	1463.86		16.06	891.601		63.84	6.53272e-05		162.24	0.00039474
16.07	1466.43		16.07	896.658		63.93	0.00102259		162.27	0.000346478
16.08	1459.22		16.08	898.4		64.05	0.000116787		162.29	0.000171366
16.09	1454.04		16.09	892.36		64.09	7.62003e-05		162.39	0.00011145
16.1	1462.72		16.1	891.668		64.12	4.70783e-06		162.5	0.000165367
16.11	1461.46		16.11	890.234		64.14	0.000900829		162.54	0.000226728
16.12	1457.38		16.12	880.96		64.19	0.000597978		162.61	0.00020616
16.13	1454.15		16.13	873.577		64.22	0.000435934		162.7	0.000960112
16.14	1449.53		16.14	872.778		64.27	0.04351		162.77	0.000171537
16.15	1448.68		16.15	868.857		64.34	0.00645266		162.88	0.000750594
16.16	1444.88		16.16	871.986		64.37	0.00231337		162.9	6.86545e-05
16.17	1438.16		16.17	872.18		64.39	0.00202383		163.02	0.000242199
16.18	1433.66		16.18	877.184		64.42	0.00104815		163.05	6.60159e-05
16.19	1433.38		16.19	880.393		64.48	2.75044e-05		163.11	8.63726e-05
16.2	1439.45		16.2	879.461		64.51	6.30339e-06		163.14	0.000154848
16.21	1448.71		16.21	883.156		64.55	0.00014164		163.21	0.000361029
16.22	1456.71		16.22	882.087		64.59	5.19638e-05		163.31	0.087692
16.23	1444.08		16.23	878.578		64.64	0.00398297		163.45	6.66492e-05
16.24	1442.36		16.24	874.15		64.66	0.00200407		163.49	0.000100414
16.25	1435.38		16.25	879.52		64.68	0.005862		163.85	0.0088602
16.26	1390.67		16.26	888.817		64.72	0.00583797		163.87	0.000353327
16.27	1382.04		16.27	901.166		64.76	0.00284396		163.9	0.000402411
16.28	1366.43		16.28	892.339		64.8	5.69929e-05		164.02	0.00033084
16.29	1356.75		16.29	893.392		64.86	0.00591337		164.09	9.97996e-05
16.3	1360.56		16.3	906.168		64.89	0.000460998		164.2	0.000204127
16.31	1361.05		16.31	910.008		64.91	0.00240644		164.56	4.78391e-05
16.32	1357.97		16.32	907.043		64.93	0.00251175		164.69	2.41708e-05
16.33	1346.29		16.33	901.643		64.97	5.3694e-05		164.8	0.00239242
16.34	1342.41		16.34	906.171		65.02	0.0251332		164.91	0.000199486
16.35	1341.75		16.35	903.043		65.06	0.00869854		165.08	9.8388e-06
16.36	1337.11		16.36	904.864		65.13	0.00426321		165.16	0.000124572
16.37	1333.02		16.37	900.698		65.18	7.54898e-06		165.23	5.78268e-05
16.38	1331.83		16.38	902.243		65.21	9.40195e-05		165.36	0.000165633
16.39	1325.94		16.39	909.881		65.27	7.27488e-05		165.45	0.00143278
16.4	1321.06		16.4	910.612		65.29	0.000101145		165.6	0.000503627
16.41	1316.03		16.41	901.639		65.31	7.64445e-05		165.83	4.46234e-05
16.42	1312.36		16.42	906.044		65.35	0.00383415		165.87	3.53909e-05
16.43	1323.93		16.43	909.582		65.37	0.00147232		165.91	6.50739e-05
16.44	1330.02		16.44	905.995		65.39	0.00105191		166.04	9.20747e-05
16.45	1323.99		16.45	909.627		65.42	0.000204552		166.11	2.10271e-05
16.46	1321.15		16.46	910.847		65.44	0.000465321		166.17	2.48368e-05
16.47	1321.88		16.47	908.403		65.48	0.000284979		166.21	0.000382032
16.48	1323.83		16.48	908.588		65.52	9.86194e-05		166.28	0.000820814
16.49	1320.12		16.49	910.256		65.55	5.9207e-05		166.37	0.00103436
16.5	1312.85		16.5	910.398		65.58	1.64695e-05		166.5	0.00657815
16.51	1301.14		16.51	911.249		65.64	8.68898e-05		166.52	0.00028166
16.52	1295.43		16.52	909.276		65.66	0.00226799		166.62	0.031981
16.53	1306.09		16.53	918.624		65.68	0.00032293		166.65	0.0319328
16.54	1327.61		16.54	925.203		65.72	2.40271e-05		167.28	0.000121537
16.55	1326.95		16.55	931.83		65.77	4.90127e-05		167.39	2.23398e-05
16.56	1327.64		16.56	924.892		65.79	0.00164758		167.59	1.34097e-05
16.57	1322.69		16.57	918.252		65.82	0.00158691		167.66	3.10926e-05
16.58	1323.49		16.58	920.08		65.85	0.000611475		167.78	8.38586e-06
16.59	1325.68		16.59	918.877		65.87	0.000433428		167.85	2.70427e-06
16.6	1319.22		16.6	921.004		65.89	0.000177991		167.88	1.31784e-05
16.61	1320.57		16.61	924.094		65.95	0.000448254		168.08	0.000132528
16.62	1325.82		16.62	927.042		65.98	0.00105202		168.15	3.01583e-05
16.63	1327.94		16.63	935.175		66.03	0.000795034		168.23	0.00228197
16.64	1337.2		16.64	940.389		66.07	0.000512168		168.36	0.000547798
16.65	1329.42		16.65	935.059		66.13	9.97771e-05		168.4	0.00267807
16.66	1325.79		16.66	928.687		66.18	7.35188e-05		168.57	0.00093775
16.67	1326.37		16.67	933.767		66.22	5.33725e-05		168.66	0.000473101
16.68	1328.58		16.68	937.746		66.26	1.98611e-05		168.7	0.000328087
16.69	1328.24		16.69	942.127		66.31	0.00796932		169.06	0.00114259
16.7	1330.16		16.7	948.232		66.34	0.00769928		169.11	0.00015877
16.71	1338		16.71	952.319		66.36	0.000553264		169.21	0.000251432
16.72	1339.03		16.72	942.229		66.38	0.000459658		169.24	7.66419e-05
16.73	1330.62		16.73	942.197		66.43	0.000291871		169.34	7.27046e-05
16.74	1326.57		16.74	945.071		66.48	0.00688042		169.42	0.00071106
16.75	1320.4		16.75	945.553		66.51	0.00171209		169.49	0.000670371
16.76	1317.81		16.76	949.292		66.6	0.00156749		169.57	0.000135448
16.77	1313.82		16.77	943.927		66.63	0.00084846		169.64	0.010968
16.78	1331.61		16.78	945.325		66.68	0.00459216		169.68	0.000247552
16.79	1322.71		16.79	946.125		66.73	0.000120134		169.83	1.17445e-05
16.8	1325.46		16.8	954.075		66.78	0.000114577		169.85	0.000377396
16.81	1328.76		16.81	959.827		66.8	0.00407359		169.9	0.000203034
16.82	1323.05		16.82	957.782		66.82	0.00196879		170.02	0.000131896
16.83	1326.18		16.83	958.292		66.84	0.000131015		170.12	0.00069325
16.84	1331.43		16.84	962.442		66.87	0.000196507		170.21	0.000173848
16.85	1328.46		16.85	965.194		66.91	9.72608e-05		170.32	0.000568014
16.86	1323.16		16.86	970.589		66.93	4.78025e-05		170.41	0.000178162
16.87	1315.74		16.87	970.645		66.98	0.000562977		170.44	0.00261609
16.88	1321.8		16.88	963.438		67	0.000396496		170.59	0.00257357
16.89	1319.24		16.89	978.065		67.04	0.000113714		170.74	0.000279348
16.9	1325.65		16.9	978.218		67.06	0.000103833		170.79	0.000179359
16.91	1320.25		16.91	977.502		67.09	0.000814266		170.82	4.03337e-05
16.92	1320.93		16.92	988.973		67.15	0.000121688		170.86	0.000138924
16.93	1306.7		16.93	983.307		67.18	0.00027838		170.92	0.000181965
16.94	1306.59		16.94	967.34		67.21	0.00028874		170.95	0.000405531
16.95	1306.67		16.95	962.787		67.23	0.000771135		171.01	0.00504133
16.96	1310.18		16.96	969.828		67.26	0.000116206		171.07	0.00186266
16.97	1318.36		16.97	968.134		67.29	3.39467e-05		171.1	0.00111452
16.98	1313.94		16.98	972.265		67.36	4.78277e-05		171.22	0.000287913
16.99	1311.23		16.99	965.374		67.4	0.000382346		171.29	0.00269789
17	1316.31		17	983.719		67.43	0.000192139		171.41	0.00224413
17.01	1320.56		17.01	991.448		67.46	0.000181142		171.44	0.000239485
17.02	1320.15		17.02	983.211		67.51	4.122e-05		171.55	0.000104603
17.03	1317.58		17.03	984.985		67.55	0.00010263		171.58	0.000264977
17.04	1309.6		17.04	988.625		67.57	0.00342183		171.75	4.17719e-05
17.05	1312.17		17.05	995.865		67.6	0.00170888		171.86	0.00016992
17.06	1308.64		17.06	995.469		67.64	0.0036105		171.88	0.0010497
17.07	1306.56		17.07	999.01		67.73	0.00169022		171.97	0.000842508
17.08	1308.89		17.08	1006.76		67.8	0.000172079		172	0.000201461
17.09	1323.2		17.09	1009.46		67.83	8.5926e-05		172.07	0.00109567
17.1	1328.91		17.1	1005		67.9	2.83707e-05		172.25	0.000650945
17.11	1324.1		17.11	1012.31		67.94	0.00101553		172.32	0.000400335
17.12	1320.24		17.12	1009.66		67.96	0.000755489		172.52	0.000195576
17.13	1314.17		17.13	1011.48		68.01	0.00017656		172.57	0.000152806
17.14	1315.73		17.14	1006.66		68.05	0.000255432		172.87	0.00255174
17.15	1315.39		17.15	1009.19		68.08	5.97446e-05		172.98	0.000569273
17.16	1306.55		17.16	1013.13		68.13	5.74744e-05		173.03	0.00146313
17.17	1302.57		17.17	1008.91		68.18	5.15434e-05		173.16	0.00057626
17.18	1306.18		17.18	1003.87		68.24	0.000166159		173.26	5.18961e-05
17.19	1306.73		17.19	1003.45		68.26	7.47733e-05		173.29	0.00178435
17.2	1301.11		17.2	1005.19		68.33	0.000124933		173.45	0.00161604
17.21	1310.74		17.21	1005.25		68.38	3.80985e-05		173.53	0.000308816
17.22	1312.61		17.22	1006.93		68.41	6.61542e-05		173.58	0.000149471
17.23	1317.18		17.23	1015.7		68.45	0.000451321		173.62	0.0152885
17.24	1300.86		17.24	1026.59		68.48	0.000218679		173.8	1.71111e-05
17.25	1296.8		17.25	1034.88		68.54	0.00141128		174.04	1.76242e-07
17.26	1310.44		17.26	1029.03		68.58	0.000212458		174.25	5.958e-05
17.27	1323.58		17.27	1025.09		68.62	0.000379969		174.4	1.5628e-05
17.28	1318.51		17.28	1024.43		68.64	0.000355282		174.79	0.000217874
17.29	1320.85		17.29	1020.56		68.67	6.28853e-05		174.83	0.00111397
17.3	1325.16		17.3	1026.03		68.69	7.47283e-05		175.19	0.000379698
17.31	1321.87		17.31	1025.22		68.71	4.44874e-05		175.3	0.000304887
17.32	1320.33		17.32	1014.7		68.74	0.000589259		175.38	0.000737837
17.33	1310.6		17.33	1018.52		68.79	0.000100753		175.49	0.00106588
17.34	1302.41		17.34	1026.23		68.85	0.000165336		175.63	8.33525e-05
17.35	1307.96		17.35	1032.32		68.89	3.47814e-05		175.79	0.000813637
17.36	1298.44		17.36	1037.71		68.93	2.8339e-05		175.86	0.00691051
17.37	1293.04		17.37	1032.72		68.98	4.85272e-05		175.91	0.000311099
17.38	1302.29		17.38	1040.31		69.03	3.63292e-05		176.12	0.00175734
17.39	1299.84		17.39	1044.48		69.06	3.35234e-05		176.22	0.00169275
17.4	1298.07		17.4	1042.13		69.09	0.000106809		176.31	0.00135684
17.41	1302.25		17.41	1035.16		69.13	8.59825e-05		176.45	0.000544437
17.42	1304.7		17.42	1035.06		69.16	1.07925e-06		176.62	0.00132464
17.43	1301.92		17.43	1037.27		69.23	0.000860011		176.66	4.55879e-05
17.44	1299.55		17.44	1034.76		69.27	0.000256226		176.76	0.00367629
17.45	1306.79		17.45	1039.67		69.3	0.000158532		176.87	0.000695567
17.46	1317.52		17.46	1038.52		69.33	3.77353e-05		176.92	0.000179156
17.47	1316.17		17.47	1039.09		69.36	0.000129872		176.99	0.000206485
17.48	1314.71		17.48	1038.22		69.38	7.10333e-05		177.13	0.000104794
17.49	1307.82		17.49	1041.33		69.43	9.70362e-05		177.17	8.88498e-05
17.5	1298.22		17.5	1044.29		69.45	0.000118424		177.29	0.0057957
17.51	1295.55		17.51	1047.73		69.47	3.9634e-06		177.33	0.000330257
17.52	1300.64		17.52	1053.16		69.54	0.159786		177.4	0.00157162
17.53	1298.65		17.53	1049.86		69.58	5.52123e-05		177.51	0.000829839
17.54	1292.95		17.54	1047.94		69.6	3.49828e-05		177.57	0.000471448
17.55	1292.64		17.55	1048.93		69.63	0.0646246		177.69	0.00165923
17.56	1300.67		17.56	1049.8		69.66	2.17485e-05		177.77	0.000234621
17.57	1301.41		17.57	1050.21		69.68	0.000293846		177.84	0.0014045
17.58	1296.39		17.58	1059.31		69.7	0.00016775		177.96	0.000214128
17.59	1299.55		17.59	1061.21		69.72	2.41008e-05		178.03	0.000619034
17.6	1301.5		17.6	1065.24		69.75	2.65262e-05		178.19	0.00148311
17.61	1308.73		17.61	1067.47		69.8	0.0619827		178.23	0.00147868
17.62	1305.95		17.62	1073.74		69.83	1.58053e-05		178.31	0.00170035
17.63	1301.97		17.63	1098.63		69.88	0.0488138		178.33	0.000630821
17.64	1291.91		17.64	1084.67		69.92	0.00259207		178.37	0.000629055
17.65	1279.73		17.65	1075.5		69.94	0.0142858		178.51	0.000269406
17.66	1264.47		17.66	1077.5		69.98	0.0130839		178.55	0.000351542
17.67	1272.63		17.67	1078.95		70.01	0.0093178		178.67	0.000112738
17.68	1280.83		17.68	1076.98		70.03	0.00476736		178.72	0.000274692
17.69	1290.91		17.69	1064.1		70.05	0.00182902		178.79	0.00160441
17.7	1293.43		17.7	1074.86		70.08	0.000942168		178.84	0.000516294
17.71	1286.51		17.71	1073.71		70.14	0.000214693		178.89	0.000324967
17.72	1289.07		17.72	1069.12		70.17	0.000265711		178.93	0.000174359
17.73	1293.21		17.73	1061.11		70.2	8.92093e-05		179	0.000127891
17.74	1297.01		17.74	1060.84		70.22	0.000146166		179.08	0.000901337
17.75	1302.4		17.75	1067.87		70.25	0.00214964		179.12	0.000666103
17.76	1302.53		17.76	1059.26		70.28	0.000120166		179.15	0.000135767
17.77	1300.3		17.77	1060.25		70.33	0.001939		179.24	0.000922644
17.78	1307.51		17.78	1066.37		70.37	1.09205e-05		179.26	0.000767766
17.79	1305.98		17.79	1064.04		70.42	5.78478e-05		179.38	0.000925534
17.8	1295.3		17.8	1065.77		70.46	2.14869e-05		179.51	0.000318816
17.81	1293.03		17.81	1073.72		70.49	7.69637e-06		179.59	0.000529025
17.82	1288.85		17.82	1077.83		70.55	0.00183964		179.77	0.03578
17.83	1277.84		17.83	1105.03		70.57	0.000896906		179.9	3.98182e-05
17.84	1287.87		17.84	1091.24		70.59	9.79319e-07		180.02	5.43765e-05
17.85	1278.75		17.85	1108.46		70.63	4.46023e-05		180.11	0.000137407
17.86	1272.28		17.86	1097.4		70.68	0.000448689		180.25	0.000141499
17.87	1250.78		17.87	1116.02		70.7	0.00017373		180.36	0.000924355
17.88	1241.69		17.88	1117.6		70.73	6.10361e-06		180.42	5.71999e-05
17.89	1244.76		17.89	1114.33		70.75	0.000154668		180.56	0.000120979
17.9	1247.32		17.9	1114.83		70.8	3.01231e-05		180.84	1.53413e-05
17.91	1240.78		17.91	1118.85		70.82	8.07782e-05		180.94	3.10462e-05
17.92	1232.13		17.92	1120.36		70.88	0.000348752		181.24	6.00387e-05
17.93	1236.94		17.93	1120.5		70.92	0.000250829		181.49	0.000820834
17.94	1245.47		17.94	1122.14		70.98	0.000208144		181.65	0.000181787
17.95	1236.04		17.95	1130.82		71	8.76235e-05		181.78	0.000484452
17.96	1221.58		17.96	1134.89		71.03	5.45181e-05		181.82	0.000117317
17.97	1222.25		17.97	1135.09		71.06	3.49257e-05		181.95	0.00754927
17.98	1219.78		17.98	1129.21		71.09	0.0220493		182.1	0.000711691
17.99	1218.4		17.99	1131.43		71.11	0.0217778		182.15	0.00030918
18	1223.2		18	1127.48		71.14	0.00303661		182.33	0.000187418
18.01	1223.93		18.01	1139.02		71.16	0.00165989		182.43	0.000777351
18.02	1226.04		18.02	1139.02		71.18	2.9504e-05		182.5	8.32603e-05
18.03	1220.44		18.03	1138.8		71.24	0.0185836		182.61	2.93131e-05
18.04	1211.18		18.04	1144.59		71.27	0.0183282		182.73	0.000719146
18.05	1214.99		18.05	1143.78		71.33	5.7778e-05		182.87	0.0153093
18.06	1223.07		18.06	1140.71		71.38	2.78542e-05		182.9	0.000124217
18.07	1225.16		18.07	1139.8		71.41	4.45692e-05		182.92	0.000259339
18.08	1221.15		18.08	1143.72		71.46	8.80917e-05		182.94	0.000178523
18.09	1217.89		18.09	1149.57		71.48	0.000215733		183.04	0.000194921
18.1	1211.57		18.1	1146.31		71.55	0.000119034		183.18	0.00456143
18.11	1217.79		18.11	1149.47		71.57	3.93141e-05		183.32	0.00386676
18.12	1217.87		18.12	1157.42		71.61	0.000126563		183.37	0.000381368
18.13	1223.91		18.13	1160		71.64	9.71506e-05		183.48	7.01844e-05
18.14	1233.78		18.14	1155.6		71.67	0.000498198		183.54	4.01029e-06
18.15	1222.65		18.15	1147.41		71.69	0.000244294		183.62	8.99713e-05
18.16	1219.1		18.16	1157.17		71.75	0.0124273		183.69	3.7713e-05
18.17	1219.22		18.17	1156.14		71.78	0.0123242		183.77	6.64846e-05
18.18	1224.84		18.18	1163.98		71.85	0.0116731		183.84	7.60104e-05
18.19	1222.05		18.19	1156.93		71.88	0.000971083		183.93	0.000984379
18.2	1220.24		18.2	1164.52		71.91	9.04914e-05		184	0.000828083
18.21	1214.93		18.21	1164.53		71.94	0.000129339		184.16	0.000246687
18.22	1215		18.22	1159.94		71.96	0.00014418		184.24	0.0226924
18.23	1210.58		18.23	1166.94		71.99	1.75664e-07		184.31	0.0220998
18.24	1208.14		18.24	1165.95		72.02	0.000466491		184.33	0.000320746
18.25	1210.11		18.25	1172.98		72.04	0.000255103		184.39	4.18719e-05
18.26	1216		18.26	1167.74		72.08	0.000143046		184.46	0.000116629
18.27	1220.79		18.27	1171.49		72.1	0.0105019		184.65	9.09286e-05
18.28	1214.3		18.28	1171.12		72.14	0.0104967		184.72	0.000215002
18.29	1223.93		18.29	1171.97		72.16	0.0103654		184.9	0.00147213
18.3	1228.31		18.3	1171.06		72.18	0.0102645		184.94	0.00021368
18.31	1227.84		18.31	1170.84		72.2	0.0102345		185.02	0.00157798
18.32	1225.61		18.32	1169.06		72.23	0.000711405		185.21	0.000625904
18.33	1217.56		18.33	1171.31		72.25	0.0087166		185.24	0.000102915
18.34	1213.82		18.34	1171.4		72.28	0.000372508		185.42	0.000500087
18.35	1207.02		18.35	1173.73		72.3	0.000570327		185.57	4.7946e-05
18.36	1205.95		18.36	1181.76		72.32	0.00771316		185.74	3.35395e-05
18.37	1200.21		18.37	1185.71		72.37	0.000779921		185.88	0.000750745
18.38	1195.41		18.38	1181.83		72.45	0.000572259		185.93	0.00010119
18.39	1209.23		18.39	1175.78		72.47	0.000367186		185.95	2.45287
18.4	1203.94		18.4	1177.87		72.51	0.000217758		186.25	0.000281259
18.41	1199.18		18.41	1182.84		72.53	9.20624e-05		186.36	3.24989e-05
18.42	1200.66		18.42	1191.96		72.56	3.23572e-05		186.56	6.02129e-05
18.43	1196.75		18.43	1195.87		72.59	0.000278741		186.68	0.000237843
18.44	1196.69		18.44	1191.38		72.65	0.000221754		186.94	2.34826e-05
18.45	1203.9		18.45	1196.3		72.68	0.000123396		187.09	3.6939e-05
18.46	1193.28		18.46	1190.84		72.75	4.16092e-05		187.17	8.63219e-06
18.47	1200.01		18.47	1194.71		72.78	2.92941e-05		187.39	9.11827e-05
18.48	1196.67		18.48	1191.45		72.83	1.48137e-05		187.43	9.09683e-05
18.49	1193.47		18.49	1194.06		72.86	0.00623473		187.59	1.58257e-06
18.5	1197.1		18.5	1201.86		72.89	0.00308746		187.74	8.16747e-05
18.51	1202.43		18.51	1199.27		72.92	0.000126384		187.97	6.03338e-05
18.52	1198.5		18.52	1208.46		72.97	8.32148e-06		188.03	7.01267e-05
18.53	1199.48		18.53	1207.49		72.99	0.000237785		188.15	6.03795e-05
18.54	1199.76		18.54	1215.45		73.05	0.000200715		188.33	0.000292891
18.55	1197.38		18.55	1215.64		73.07	0.000128225		188.44	0.000116749
18.56	1199.9		18.56	1225.9		73.12	0.000491442		188.59	0.000108082
18.57	1202.56		18.57	1230.46		73.19	0.00021339		188.7	0.000795208
18.58	1207.06		18.58	1227.24		73.23	0.000112182		188.88	0.000178802
18.59	1204.66		18.59	1218.19		73.29	0.00448425		189.02	0.000572596
18.6	1199.18		18.6	1236.96		73.31	0.00224404		189.12	0.0156561
18.61	1194.69		18.61	1248.8		73.36	9.03657e-05		189.18	0.000257661
18.62	1194.02		18.62	1245.87		73.4	8.71492e-05		189.23	0.0018888
18.63	1198.08		18.63	1246.18		73.43	2.17112e-06		189.32	0.0017344
18.64	1205.98		18.64	1242.38		73.46	8.41902e-05		189.36	0.000737139
18.65	1195.89		18.65	1247.73		73.48	5.70235e-05		189.39	6.78157e-05
18.66	1200		18.66	1242.3		73.5	4.57394e-05		189.41	9.31756e-05
18.67	1195.34		18.67	1241.31		73.53	0.00115903		189.73	2.1804e-06
18.68	1201.73		18.68	1239.95		73.58	0.00114871		189.85	0.000284904
18.69	1196.55		18.69	1243.36		73.61	0.00058542		190.09	0.00050337
18.7	1194.68		18.7	1247.12		73.65	0.00603016		190.12	0.000119675
18.71	1194.61		18.71	1262.39		73.68	6.46017e-05		190.24	0.00482843
18.72	1194.18		18.72	1264.61		73.7	0.005883		190.31	0.000734788
18.73	1195.05		18.73	1265.1		73.72	0.00490812		190.47	6.65487e-05
18.74	1189.6		18.74	1264.42		73.79	0.000101835		190.92	0.000378393
18.75	1184.15		18.75	1265.01		73.84	0.000311544		190.98	8.77581e-05
18.76	1182.86		18.76	1260.97		73.87	0.000197434		191.04	1.83364e-05
18.77	1182.98		18.77	1261.07		73.96	0.00399385		191.17	0.000178178
18.78	1182.12		18.78	1262.8		73.98	3.82509e-06		191.31	0.00219425
18.79	1186.53		18.79	1266.46		74.03	0.0039571		191.4	0.000207887
18.8	1204.82		18.8	1266.43		74.07	0.00391561		191.46	0.000291128
18.81	1207.49		18.81	1264.93		74.09	0.00122096		191.51	5.14663e-05
18.82	1199.4		18.82	1268.53		74.12	0.00013491		191.75	0.00595418
18.83	1191.78		18.83	1271.78		74.15	5.70488e-05		191.91	0.000259561
18.84	1190.3		18.84	1271.6		74.22	0.000498796		192.03	0.000222415
18.85	1185.83		18.85	1273.35		74.24	0.000333092		192.13	0.000215395
18.86	1192.96		18.86	1278.8		74.26	0.000709659		192.25	0.000159698
18.87	1194.12		18.87	1281.37		74.3	0.000292537		192.35	0.000101728
18.88	1202.03		18.88	1278.5		74.34	4.94712e-05		192.42	0.00214523
18.89	1201.93		18.89	1272.04		74.4	0.000464514		192.53	0.000513877
18.9	1196.15		18.9	1275.57		74.45	0.000177538		192.65	0.000103911
18.91	1193.11		18.91	1287.2		74.48	0.000163047		192.71	0.000144729
18.92	1192.19		18.92	1287.8		74.5	0.000156705		192.84	0.000138821
18.93	1189.85		18.93	1283.89		74.54	0.000108867		192.93	6.49343e-05
18.94	1205.22		18.94	1286.89		74.56	2.63741e-05		193.05	1.59039e-05
18.95	1200.54		18.95	1294.16		74.59	0.000911984		193.14	0.000261681
18.96	1203.25		18.96	1286.71		74.61	0.000481643		193.2	0.00106025
18.97	1201.52		18.97	1285.81		74.64	2.0576e-05		193.26	0.000249672
18.98	1196.08		18.98	1287.56		74.67	5.45775e-06		193.39	0.000793074
18.99	1196.66		18.99	1286.72		74.7	3.57865e-05		193.51	0.00850194
19	1201.6		19	1294.42		74.74	2.65429e-05		193.56	0.000307218
19.01	1198.71		19.01	1296.11		74.79	0.013132		193.83	0.00336622
19.02	1191.83		19.02	1294.1		74.81	1.08935e-05		193.96	0.000733724
19.03	1202.29		19.03	1292.12		74.84	0.000311618		194.04	7.2848e-05
19.04	1198.63		19.04	1295.22		74.88	0.000187915		194.11	1.81485e-05
19.05	1203.15		19.05	1296.43		74.92	0.0127606		194.15	0.00035901
19.06	1196.58		19.06	1288.46		74.99	2.7591e-05		194.19	0.00176947
19.07	1193.14		19.07	1304.66		75.01	2.15682e-05		194.27	0.00053196
19.08	1190.29		19.08	1299.79		75.05	0.0126744		194.33	0.000673173
19.09	1190.05		19.09	1294.7		75.07	0.0126323		194.36	5.02571e-05
19.1	1191.21		19.1	1294.39		75.14	0.00018217		194.48	0.000200625
19.11	1204.29		19.11	1292.05		75.16	0.000138943		194.57	0.000141726
19.12	1209.56		19.12	1293.53		75.2	0.0001467		194.68	1.46182e-05
19.13	1207.3		19.13	1294.9		75.23	4.61382e-05		194.81	1.86206
19.14	1203.41		19.14	1296.41		75.27	0.000212065		194.97	4.98606e-06
19.15	1195.99		19.15	1296.18		75.3	7.86593e-06		195.13	9.9271e-05
19.16	1201.75		19.16	1296.85		75.33	0.000132872		195.17	7.33417e-05
19.17	1210.85		19.17	1296.29		75.36	0.00163942		195.24	1.88027e-06
19.18	1210.66		19.18	1304.69		75.39	0.00140777		195.36	3.88931e-05
19.19	1204.68		19.19	1311.2		75.41	0.000748463		195.49	0.000406678
19.2	1205.28		19.2	1324.64		75.44	0.000112159		195.51	0.000294273
19.21	1204.58		19.21	1328.7		75.48	5.98948e-05		195.61	5.5153e-05
19.22	1205.28		19.22	1334.77		75.52	8.36438e-06		195.77	0.000213141
19.23	1208.41		19.23	1327.16		75.56	0.00216915		196	0.000290039
19.24	1209.63		19.24	1336.49		75.58	0.00105928		196.03	0.00011401
19.25	1207.8		19.25	1334.35		75.61	2.86392e-05		196.28	8.33843e-05
19.26	1201.31		19.26	1334.88		75.7	7.008e-05		196.37	1.91838e-05
19.27	1206.97		19.27	1331.53		75.78	3.39606e-05		196.47	0.00029799
19.28	1213.62		19.28	1342.26		75.8	0.0063388		196.56	0.000144306
19.29	1217.86		19.29	1343.16		75.86	0.00521807		196.66	0.00218956
19.3	1223.26		19.3	1348.71		75.89	0.00262568		196.77	1.01526e-05
19.31	1223.06		19.31	1342.13		75.97	2.12209e-06		196.83	6.3416e-05
19.32	1226.96		19.32	1354.22		76.03	0.000999157		197.09	0.000110926
19.33	1221.82		19.33	1360.9		76.05	0.000775146		197.13	1.61899e-05
19.34	1219.38		19.34	1344.77		76.09	7.12923e-05		197.42	0.000124557
19.35	1219.9		19.35	1340.23		76.12	0.000213778		197.46	2.49111e-05
19.36	1220.29		19.36	1346.92		76.14	0.000199753		197.49	1.288e-05
19.37	1226.01		19.37	1354.39		76.19	0.000114261		197.61	0.000870461
19.38	1235.74		19.38	1354.03		76.25	0.000349972		197.65	0.000134703
19.39	1270.14		19.39	1358.01		76.28	4.4505e-05		197.75	2.5107e-05
19.4	1273.56		19.4	1377.68		76.31	6.27212e-05		197.87	0.0012215
19.41	1254.87		19.41	1384.03		76.36	5.21627e-05		198.17	0.000490351
19.42	1264.98		19.42	1377.09		76.4	0.00157394		198.2	8.44079e-05
19.43	1246.84		19.43	1378.85		76.42	0.000819783		198.4	0.000131902
19.44	1244.49		19.44	1386.37		76.47	5.5606e-05		198.42	1.06659e-05
19.45	1233.77		19.45	1393.31		76.5	1.39158e-05		198.58	0.000259559
19.46	1244.99		19.46	1393.93		76.53	0.00229859		198.7	3.18081e-05
19.47	1245.15		19.47	1392.9		76.56	0.000404313		198.8	8.61033e-06
19.48	1229.87		19.48	1393.63		76.61	0.00120259		199.01	0.00196341
19.49	1223.94		19.49	1388.97		76.63	0.000573905		199.16	0.000613589
19.5	1219.19		19.5	1386.98		76.66	4.59314e-05		199.2	0.00017825
19.51	1214.83		19.51	1387.29		76.68	0.0001152		199.3	0.000248566
19.52	1223.71		19.52	1385.43		76.71	0.000118097		199.35	0.000142006
19.53	1227.26		19.53	1392.32		76.73	0.0950674		199.53	0.00813396
19.54	1232.94		19.54	1401.65		76.77	0.000324028		199.56	0.000134869
19.55	1234.84		19.55	1408.53		76.8	2.57274e-05		199.58	3.99982e-05
19.56	1235.4		19.56	1400.24		76.88	0.0944872		199.75	0.000215754
19.57	1232.08		19.57	1398.28		76.91	0.00154998		199.82	0.000414421
19.58	1227.02		19.58	1404.48		76.95	0.00010255		199.85	0.000291663
19.59	1221.76		19.59	1401.67		77	5.63496e-05		199.88	1.21269e-05
19.6	1210.41		19.6	1402.57		77.05	0.0890744		199.9	6.83472e-05
19.61	1206.68		19.61	1405.26		77.11	0.0890347		200.03	0.0057651
19.62	1203.77		19.62	1405.72		77.14	2.72067e-05		200.16	9.29993e-05
19.63	1201.45		19.63	1407.5		77.18	1.3834e-05		200.22	9.79525e-05
19.64	1209.75		19.64	1402.23		77.22	0.0889705		200.31	3.38574e-05
19.65	1220.88		19.65	1405.53		77.29	0.0786298		200.37	0.000165372
19.66	1222.83		19.66	1422.48		77.31	0.0152152		200.51	2.22874e-05
19.67	1216.28		19.67	1421.91		77.36	0.00146546		200.57	0.00875722
19.68	1224.49		19.68	1422.96		77.38	0.000871746		200.81	0.0024122
19.69	1219.75		19.69	1424.47		77.4	0.000585403		200.87	0.000227546
19.7	1209.33		19.7	1428.71		77.44	0.00018885		201.02	1.05172e-05
19.71	1209.07		19.71	1431.63		77.48	0.000465829		201.28	8.37838e-05
19.72	1212.19		19.72	1426.96		77.5	9.75928e-05		201.4	0.00131692
19.73	1208.36		19.73	1423.21		77.52	0.000119181		201.44	0.000661102
19.74	1205.97		19.74	1423.83		77.56	0.000112237		201.57	0.000145106
19.75	1209.75		19.75	1415.84		77.63	0.0136947		201.66	0.00383617
19.76	1213.42		19.76	1420.46		77.69	9.36971e-05		201.83	3.51109e-05
19.77	1215.28		19.77	1415.34		77.72	6.85547e-05		201.98	3.3494e-05
19.78	1218.96		19.78	1419.2		77.75	2.34344e-05		202.37	0.00033973
19.79	1221.03		19.79	1425.73		77.83	8.59219e-05		202.55	0.000225373
19.8	1216.83		19.8	1427.28		77.87	4.12155e-05		202.66	0.000105084
19.81	1210.61		19.81	1432.41		77.89	0.000999074		202.75	0.000243725
19.82	1201.58		19.82	1435.42		77.92	0.000842853		202.98	0.000677922
19.83	1196.36		19.83	1442.66		77.94	0.000509435		203.09	0.000128051
19.84	1195.46		19.84	1441.76		77.97	0.00260601		203.2	0.000129049
19.85	1185.5		19.85	1444.99		78.02	0.00256666		203.38	0.000774374
19.86	1193.86		19.86	1445.94		78.08	0.000183467		203.49	9.32307e-05
19.87	1207.63		19.87	1455.18		78.1	0.000113291		203.65	0.000891727
19.88	1199.12		19.88	1454.61		78.16	0.00223097		203.7	0.000810923
19.89	1202.61		19.89	1449.19		78.2	1.63131e-05		203.76	0.00109199
19.9	1217.83		19.9	1450.77		78.22	0.00215006		203.87	0.00101091
19.91	1224.1		19.91	1445.22		78.26	0.00207335		204.25	0.00030236
19.92	1220.59		19.92	1449.74		78.31	0.00202901		204.36	0.000195959
19.93	1228.05		19.93	1448.09		78.35	0.00101748		204.52	0.000149303
19.94	1224.67		19.94	1446.89		78.4	0.00965123		204.59	0.000114855
19.95	1220.82		19.95	1454.45		78.42	0.000508791		204.63	0.0196098
19.96	1216.6		19.96	1456.39		78.46	0.000145717		204.76	0.00109558
19.97	1223.85		19.97	1460.65		78.5	8.06291e-05		204.86	0.000256598
[truncated: 82,723 more rows]
